# Supplementary material for: Seasonal origins of soil water used by trees
Source: Copernicus journal article supplement (doi:10.5194/hess-23-1199-2019), 2019-03-01
Supplement: Supplementary file 1 [file hess-23-1199-2019-supplement.zip]

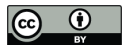

## *Supplement of*

# Seasonal origins of soil water used by trees

**Scott T. Allen et al.**

*Correspondence to:* Scott T. Allen (allensc@ethz.ch)

- hess-23-1199-2019-supplement-title-page.pdf
- Data-IsotopeValues.csv
- Data-SiteLocations.csv
- Data-SoilCharacteristics.csv
- Supplemental Figures and Tables to Allen et al..pdf

The copyright of individual parts of the supplement might differ from the CC BY 4.0 License.
