# Supplementary material for: Seasonal origins of soil water used by trees
Source: Copernicus journal article supplement (doi:10.5194/hess-23-1199-2019), 2019-03-01
Supplement: Supplementary file 3 [file hess-23-1199-2019-supplement.zip]

Archive with 5 entries (5 files):
- Data-SiteLocations.csv
- hess-23-1199-2019-supplement-title-page.pdf
- Supplemental Figures and Tables to Allen et al..pdf
- Data-IsotopeValues.csv
- Data-SoilCharacteristics.csv
