# Supplementary material for: Seasonal origins of soil water used by trees
Source: Copernicus journal article supplement (doi:10.5194/hess-23-1199-2019), 2019-03-01
Supplement: Supplementary file 3 [file hess-23-1199-2019-supplement.zip › Data-IsotopeValues.csv]

site.code	sample type	Depth (lysimeter only)	tree.species (xylem only)	18O/16O (�)	2H/1H (�)
1039	Lysimeter	100	nan	-11.25	-76.31
1039	Lysimeter	50	nan	-11.91	-86.47
1009	Lysimeter	50	nan	-9.93	-75.01
1107	Lysimeter	20	nan	-10.71	-69.48
1107	Lysimeter	40	nan	-11.23	-79.96
1107	Lysimeter	70	nan	-11.71	-82.36
1090	Lysimeter	20	nan	-10.5	-76.2
1090	Lysimeter	80	nan	-12.09	-87.41
1075	Lysimeter	100	nan	-12.44	-87.27
1075	Lysimeter	20	nan	-10.22	-67.11
1075	Lysimeter	50	nan	-12.73	-91.63
1074	Lysimeter	20	nan	-9.02	-61.11
1074	Lysimeter	50	nan	-12.44	-84.39
1074	Lysimeter	90	nan	-13.39	-93.59
1034	Lysimeter	30	nan	-9.78	-71.41
1034	Lysimeter	80	nan	-10.71	-78.82
1029	Lysimeter	80	nan	-9.28	-65.58
1113	Lysimeter	20	nan	-10.07	-67.26
1113	Lysimeter	50	nan	-11.09	-80.19
1113	Lysimeter	80	nan	-11.71	-79.42
1091	Lysimeter	30	nan	-11.22	-76.94
1091	Lysimeter	80	nan	-11.55	-79.27
1110	Lysimeter	20	nan	-11.03	-80.61
1110	Lysimeter	50	nan	-12.33	-88.71
1110	Lysimeter	80	nan	-11.88	-86.2
1097	Lysimeter	120	nan	-13.27	-93.63
1097	Lysimeter	15	nan	-11.31	-74.66
1097	Lysimeter	50	nan	-12.87	-91.3
1038	Lysimeter	15	nan	-10.97	-76.16
1038	Lysimeter	30	nan	-10.43	-72.23
1073	Lysimeter	20	nan	-11.4	-78.43
1073	Lysimeter	80	nan	-11.12	-79.46
1117	Lysimeter	20	nan	-11.64	-86.63
1117	Lysimeter	50	nan	-13.72	-93.09
1117	Lysimeter	80	nan	-11.27	-81.97
1046	Lysimeter	20	nan	-9.99	-70.35
1046	Lysimeter	50	nan	-10.97	-86.22
1046	Lysimeter	80	nan	-12.17	-85.23
1404	Lysimeter	30	nan	-9.92	-77.82
1404	Lysimeter	60	nan	-11.24	-87.32
1053	Lysimeter	100	nan	-12.61	-94.36
1054	Lysimeter	100	nan	-12.37	-92.93
1054	Lysimeter	20	nan	-10.93	-78.79
1054	Lysimeter	50	nan	-12.09	-92.99
1044	Lysimeter	80	nan	-10.54	-72.23
1118	Lysimeter	20	nan	-11.05	-86.78
1118	Lysimeter	50	nan	-12.53	-88.64
1118	Lysimeter	80	nan	-11.87	-82.2
1014	Lysimeter	80	nan	-9.21	-65.83
1062	Lysimeter	20	nan	-10.13	-72.28
1062	Lysimeter	80	nan	-11.82	-78.54
1004	Lysimeter	20	nan	-9.7	-68.51
1004	Lysimeter	80	nan	-10.2	-72.59
1023	Lysimeter	20	nan	-10.01	-83.03
1023	Lysimeter	80	nan	-13.05	-98.5
1099	Lysimeter	20	nan	-11.31	-81.33
1099	Lysimeter	50	nan	-11.73	-79.74
1099	Lysimeter	80	nan	-11.42	-77.7
1099	Lysimeter	20	nan	-9.71	-61
1099	Lysimeter	50	nan	-11.39	-76.18
1099	Lysimeter	80	nan	-10.64	-70.19
1105	Lysimeter	20	nan	-11.43	-73.14
1105	Lysimeter	40	nan	-13.64	-87.71
1105	Lysimeter	70	nan	-13.13	-91.32
1080	Lysimeter	20	nan	-10.69	-79.44
1080	Lysimeter	50	nan	-11.51	-83.9
1080	Lysimeter	80	nan	-11.93	-88.52
1066	Lysimeter	30	nan	-11.43	-79.33
1066	Lysimeter	80	nan	-11.92	-77.57
1412	Lysimeter	20	nan	-9.53	-66.16
1412	Lysimeter	50	nan	-12.46	-84.01
1412	Lysimeter	50	nan	-12.71	-90.44
1412	Lysimeter	50	nan	-13.01	-84.97
1412	Lysimeter	50	nan	-12.49	-90.85
1412	Lysimeter	50	nan	-11.88	-84.44
1412	Lysimeter	50	nan	-12.76	-80.29
1412	Lysimeter	50	nan	-12.69	-87.53
1412	Lysimeter	50	nan	-13.07	-92.25
1412	Lysimeter	80	nan	-13.02	-93.41
1083	Lysimeter	20	nan	-10.66	-73.38
1083	Lysimeter	50	nan	-13.09	-91.03
1083	Lysimeter	90	nan	-12.52	-85.7
1052	Lysimeter	30	nan	-11.07	-75.93
1052	Lysimeter	80	nan	-12.29	-86.49
1088	Lysimeter	20	nan	-11.67	-83.43
1088	Lysimeter	80	nan	-13.02	-93.64
1001	Xylem	nan	F. sylvatica	-6.23	-70.19
1001	Xylem	nan	F. sylvatica	-6.52	-72.12
1001	Xylem	nan	F. sylvatica	-7.8	-76.38
1001	Xylem	nan	F. sylvatica	-5.3	-64.97
1002	Xylem	nan	F. sylvatica	-9.21	-87.28
1002	Xylem	nan	F. sylvatica	-9.76	-84.61
1002	Xylem	nan	F. sylvatica	-9.08	-76.44
1002	Xylem	nan	F. sylvatica	-8.76	-80.19
1003	Xylem	nan	F. sylvatica	-9.32	-82.6
1003	Xylem	nan	F. sylvatica	-8.01	-77.47
1003	Xylem	nan	F. sylvatica	-8.5	-81.08
1003	Xylem	nan	F. sylvatica	-8.88	-82.42
1004	Xylem	nan	F. sylvatica	-8.25	-79.09
1004	Xylem	nan	F. sylvatica	-8.68	-81.26
1004	Xylem	nan	F. sylvatica	-9.09	-83.61
1004	Xylem	nan	F. sylvatica	-8.2	-75.49
1004	Xylem	nan	F. sylvatica	-7.68	-81.83
1005	Xylem	nan	F. sylvatica	-10.18	-91.5
1005	Xylem	nan	F. sylvatica	-10.34	-92.61
1005	Xylem	nan	F. sylvatica	-10.08	-83.92
1005	Xylem	nan	F. sylvatica	-10.03	-82.95
1006	Xylem	nan	F. sylvatica	-9.69	-83.61
1006	Xylem	nan	F. sylvatica	-8.28	-75.77
1006	Xylem	nan	F. sylvatica	-9.79	-86.63
1006	Xylem	nan	F. sylvatica	-10.06	-86.43
1007	Xylem	nan	F. sylvatica	-9.62	-86.83
1007	Xylem	nan	F. sylvatica	-9.12	-84.01
1007	Xylem	nan	F. sylvatica	-9.12	-80.59
1007	Xylem	nan	F. sylvatica	-9.51	-83.82
1008	Xylem	nan	F. sylvatica	-9.84	-86.25
1008	Xylem	nan	F. sylvatica	-9.23	-82.52
1008	Xylem	nan	F. sylvatica	-9.38	-83.46
1008	Xylem	nan	F. sylvatica	-8.78	-79.25
1010	Xylem	nan	F. sylvatica	-8.54	-78.54
1010	Xylem	nan	F. sylvatica	-7.56	-82.21
1010	Xylem	nan	F. sylvatica	-9.54	-83.28
1010	Xylem	nan	F. sylvatica	-9.91	-84.83
1011	Xylem	nan	F. sylvatica	-8.87	-82.31
1011	Xylem	nan	F. sylvatica	-9.06	-77.88
1011	Xylem	nan	F. sylvatica	-9.39	-83.42
1011	Xylem	nan	F. sylvatica	-9.16	-84.14
1012	Xylem	nan	F. sylvatica	-8.82	-81.04
1012	Xylem	nan	F. sylvatica	-8.73	-75.11
1012	Xylem	nan	F. sylvatica	-7.17	-81.41
1012	Xylem	nan	F. sylvatica	-7.92	-82.46
1013	Xylem	nan	F. sylvatica	-6.72	-75.2
1013	Xylem	nan	F. sylvatica	-6.6	-79.5
1013	Xylem	nan	F. sylvatica	-6.84	-78.8
1013	Xylem	nan	F. sylvatica	-8.46	-77.63
1014	Xylem	nan	F. sylvatica	-12.34	-80.01
1014	Xylem	nan	F. sylvatica	-9.83	-81.4
1014	Xylem	nan	F. sylvatica	-12.51	-81.26
1014	Xylem	nan	F. sylvatica	-12.25	-81.72
1015	Xylem	nan	F. sylvatica	-9.18	-70.47
1015	Xylem	nan	F. sylvatica	-8.99	-74.87
1015	Xylem	nan	F. sylvatica	-9.54	-75.64
1015	Xylem	nan	F. sylvatica	-11.25	-74.62
1018	Xylem	nan	F. sylvatica	-9.75	-86.5
1017	Xylem	nan	F. sylvatica	-11.23	-88.4
1017	Xylem	nan	F. sylvatica	-11.22	-82.73
1017	Xylem	nan	F. sylvatica	-10.06	-93.54
1018	Xylem	nan	F. sylvatica	-9.87	-88.12
1018	Xylem	nan	F. sylvatica	-9.86	-85.75
1019	Xylem	nan	F. sylvatica	-13.77	-93.21
1019	Xylem	nan	F. sylvatica	-10.59	-93.78
1019	Xylem	nan	F. sylvatica	-13.17	-89.3
1020	Xylem	nan	F. sylvatica	-9.07	-77.53
1020	Xylem	nan	F. sylvatica	-10.17	-80.21
1020	Xylem	nan	F. sylvatica	-10.12	-87.21
1020	Xylem	nan	F. sylvatica	-9.62	-79.48
1021	Xylem	nan	F. sylvatica	-9.62	-84.64
1021	Xylem	nan	F. sylvatica	-10.64	-88.36
1021	Xylem	nan	F. sylvatica	-12.91	-84.52
1022	Xylem	nan	F. sylvatica	-8.76	-84.4
1022	Xylem	nan	F. sylvatica	-7.21	-83.98
1022	Xylem	nan	F. sylvatica	-8.97	-89.62
1023	Xylem	nan	F. sylvatica	-9.81	-83.43
1023	Xylem	nan	F. sylvatica	-11.02	-89.18
1023	Xylem	nan	F. sylvatica	-10.42	-90.25
1023	Xylem	nan	F. sylvatica	-9.29	-86.57
1024	Xylem	nan	F. sylvatica	-8.02	-85.59
1024	Xylem	nan	F. sylvatica	-8.73	-86.57
1024	Xylem	nan	F. sylvatica	-9.26	-86.51
1025	Xylem	nan	F. sylvatica	-8.91	-83.18
1025	Xylem	nan	F. sylvatica	-8.56	-88.09
1025	Xylem	nan	F. sylvatica	-8.29	-80.35
1025	Xylem	nan	F. sylvatica	-9.65	-82.74
1026	Xylem	nan	F. sylvatica	-9.84	-89.69
1026	Xylem	nan	F. sylvatica	-10.43	-87.58
1026	Xylem	nan	F. sylvatica	-10.98	-85.69
1026	Xylem	nan	F. sylvatica	-11.18	-92.14
1027	Xylem	nan	F. sylvatica	-10.05	-76.02
1027	Xylem	nan	F. sylvatica	-9.67	-77.3
1027	Xylem	nan	F. sylvatica	-10.09	-87.64
1027	Xylem	nan	F. sylvatica	-10.39	-89.05
1028	Xylem	nan	F. sylvatica	-9.44	-88.13
1028	Xylem	nan	F. sylvatica	-9.85	-88.16
1028	Xylem	nan	F. sylvatica	-9.75	-85.9
1028	Xylem	nan	F. sylvatica	-9.77	-87.33
1030	Xylem	nan	F. sylvatica	-9.91	-87.46
1030	Xylem	nan	F. sylvatica	-10.9	-82.81
1030	Xylem	nan	F. sylvatica	-9.92	-86.53
1030	Xylem	nan	F. sylvatica	-10.18	-85.74
1031	Xylem	nan	F. sylvatica	-10.94	-88.44
1031	Xylem	nan	F. sylvatica	-12.24	-94.01
1031	Xylem	nan	F. sylvatica	-11.32	-94.11
1031	Xylem	nan	F. sylvatica	-10.86	-90.93
1032	Xylem	nan	F. sylvatica	-9.85	-81.37
1032	Xylem	nan	F. sylvatica	-9.18	-80.45
1032	Xylem	nan	F. sylvatica	-9.22	-84.11
1032	Xylem	nan	F. sylvatica	-8.17	-77.28
1034	Xylem	nan	F. sylvatica	-9.1	-81.77
1034	Xylem	nan	F. sylvatica	-9.7	-84.81
1034	Xylem	nan	F. sylvatica	-10.37	-88.11
1034	Xylem	nan	F. sylvatica	-10.17	-84.39
1035	Xylem	nan	F. sylvatica	-10.11	-86.48
1035	Xylem	nan	F. sylvatica	-10.2	-85.06
1035	Xylem	nan	F. sylvatica	-10.47	-83.95
1035	Xylem	nan	F. sylvatica	-8.95	-80.82
1036	Xylem	nan	F. sylvatica	-11.07	-88.77
1036	Xylem	nan	F. sylvatica	-11.14	-79.24
1035	Xylem	nan	F. sylvatica	-10.73	-91.9
1036	Xylem	nan	F. sylvatica	-10.02	-89.4
1037	Xylem	nan	F. sylvatica	-10.4	-95.89
1037	Xylem	nan	F. sylvatica	-7.85	-44.99
1037	Xylem	nan	F. sylvatica	-9.65	-84.26
1037	Xylem	nan	F. sylvatica	-8.62	-85.08
1038	Xylem	nan	F. sylvatica	-9.12	-85.99
1038	Xylem	nan	F. sylvatica	-10.44	-78.55
1038	Xylem	nan	F. sylvatica	-9.83	-88.3
1038	Xylem	nan	F. sylvatica	-8.36	-80.33
1037	Xylem	nan	F. sylvatica	-10.93	-70.38
1039	Xylem	nan	F. sylvatica	-10.26	-91.46
1039	Xylem	nan	F. sylvatica	-11.39	-95.55
1039	Xylem	nan	F. sylvatica	-11.11	-96.59
1040	Xylem	nan	F. sylvatica	-10.13	-88.92
1040	Xylem	nan	F. sylvatica	-11.88	-92.02
1040	Xylem	nan	F. sylvatica	-9.67	-83.94
1040	Xylem	nan	F. sylvatica	-10.29	-87.87
1040	Xylem	nan	F. sylvatica	-10.46	-85.12
1041	Xylem	nan	F. sylvatica	-11.52	-94.26
1042	Xylem	nan	F. sylvatica	-9.7	-85.89
1042	Xylem	nan	F. sylvatica	-9.97	-85.2
1042	Xylem	nan	F. sylvatica	-8.76	-81.24
1042	Xylem	nan	F. sylvatica	-9.92	-87.2
1043	Xylem	nan	F. sylvatica	-9.29	-80.69
1043	Xylem	nan	F. sylvatica	-9.61	-87.04
1043	Xylem	nan	F. sylvatica	-9.78	-89.93
1044	Xylem	nan	F. sylvatica	-8.88	-89.19
1044	Xylem	nan	F. sylvatica	-9.3	-81.99
1044	Xylem	nan	F. sylvatica	-9.45	-78.95
1044	Xylem	nan	F. sylvatica	-9.39	-84.38
1044	Xylem	nan	F. sylvatica	-9.71	-88.76
1045	Xylem	nan	F. sylvatica	-10.21	-82.29
1045	Xylem	nan	F. sylvatica	-9.38	-87.86
1045	Xylem	nan	F. sylvatica	-9.45	-82.45
1045	Xylem	nan	F. sylvatica	-10.32	-80.41
1047	Xylem	nan	F. sylvatica	-8.61	-86.96
1047	Xylem	nan	F. sylvatica	-10.36	-89.85
1047	Xylem	nan	F. sylvatica	-9.21	-82.86
1047	Xylem	nan	F. sylvatica	-8.47	-76.9
1048	Xylem	nan	F. sylvatica	-9.87	-87.5
1048	Xylem	nan	F. sylvatica	-9.58	-80.98
1048	Xylem	nan	F. sylvatica	-9.94	-95.83
1048	Xylem	nan	F. sylvatica	-9.14	-87.11
1049	Xylem	nan	F. sylvatica	-9.68	-82.83
1049	Xylem	nan	F. sylvatica	-10.2	-96.7
1049	Xylem	nan	F. sylvatica	-9.8	-80.79
1049	Xylem	nan	F. sylvatica	-10.08	-83.52
1050	Xylem	nan	F. sylvatica	-8.63	-75.19
1050	Xylem	nan	F. sylvatica	-9.47	-80.85
1050	Xylem	nan	F. sylvatica	-8.7	-89.52
1051	Xylem	nan	F. sylvatica	-9.48	-86.63
1061	Xylem	nan	F. sylvatica	-9.58	-91.52
1051	Xylem	nan	F. sylvatica	-9.98	-91.09
1051	Xylem	nan	F. sylvatica	-9.21	-83.9
1052	Xylem	nan	F. sylvatica	-9.84	-89.93
1052	Xylem	nan	F. sylvatica	-8.93	-72.72
1052	Xylem	nan	F. sylvatica	-9.37	-82.9
1052	Xylem	nan	F. sylvatica	-8.64	-88.48
1053	Xylem	nan	F. sylvatica	-9.79	-95.31
1053	Xylem	nan	F. sylvatica	-10.33	-96.78
1053	Xylem	nan	F. sylvatica	-10.98	-102.39
1056	Xylem	nan	F. sylvatica	-10.66	-98.33
1055	Xylem	nan	F. sylvatica	-9.26	-84.84
1055	Xylem	nan	F. sylvatica	-9.13	-87.06
1055	Xylem	nan	F. sylvatica	-9.34	-84.38
1055	Xylem	nan	F. sylvatica	-9.45	-94.64
1050	Xylem	nan	F. sylvatica	-9.13	-90.37
1043	Xylem	nan	F. sylvatica	-8.64	-90.96
1056	Xylem	nan	F. sylvatica	-8.48	-84.56
1056	Xylem	nan	F. sylvatica	-10.15	-95.93
1056	Xylem	nan	F. sylvatica	-10.05	-89.36
1061	Xylem	nan	F. sylvatica	-9.89	-82.66
1061	Xylem	nan	F. sylvatica	-8.31	-78.47
1061	Xylem	nan	F. sylvatica	-8.38	-84.56
1065	Xylem	nan	F. sylvatica	-8.89	-79.85
1065	Xylem	nan	F. sylvatica	-7.18	-76.2
1065	Xylem	nan	F. sylvatica	-8.68	-77.5
1065	Xylem	nan	F. sylvatica	-7.02	-75.55
1069	Xylem	nan	F. sylvatica	-7.89	-82.56
1069	Xylem	nan	F. sylvatica	-7.43	-81.39
1069	Xylem	nan	F. sylvatica	-9.66	-90.61
1069	Xylem	nan	F. sylvatica	-8.34	-79.98
1070	Xylem	nan	F. sylvatica	-6.05	-68.32
1070	Xylem	nan	F. sylvatica	-8.51	-84.74
1070	Xylem	nan	F. sylvatica	-5.68	-72.31
1070	Xylem	nan	F. sylvatica	-9.62	-85.47
1070	Xylem	nan	F. sylvatica	-6.79	-75.66
1071	Xylem	nan	F. sylvatica	-9.42	-86.51
1071	Xylem	nan	F. sylvatica	-7.38	-76.73
1071	Xylem	nan	F. sylvatica	-7.88	-85.97
1071	Xylem	nan	F. sylvatica	-7.17	-83.08
1072	Xylem	nan	F. sylvatica	-9.46	-92.87
1072	Xylem	nan	F. sylvatica	-7.77	-79.82
1072	Xylem	nan	F. sylvatica	-9.06	-88.74
1072	Xylem	nan	F. sylvatica	-8.98	-92.84
1074	Xylem	nan	F. sylvatica	-7.61	-76.61
1074	Xylem	nan	F. sylvatica	-7.69	-82.59
1074	Xylem	nan	F. sylvatica	-8.89	-90.68
1074	Xylem	nan	F. sylvatica	-8.89	-77.47
1076	Xylem	nan	F. sylvatica	-8.86	-80.78
1076	Xylem	nan	F. sylvatica	-9.49	-89.25
1076	Xylem	nan	F. sylvatica	-10.07	-88.1
1076	Xylem	nan	F. sylvatica	-9.19	-84.77
1060	Xylem	nan	F. sylvatica	-8.18	-84.62
1060	Xylem	nan	F. sylvatica	-7.25	-78.41
1060	Xylem	nan	F. sylvatica	-7.17	-89.72
1060	Xylem	nan	F. sylvatica	-8.28	-89.19
1067	Xylem	nan	F. sylvatica	-7.3	-81.53
1067	Xylem	nan	F. sylvatica	-9.18	-86.6
1067	Xylem	nan	F. sylvatica	-8.04	-81.27
1067	Xylem	nan	F. sylvatica	-8.38	-84.02
1078	Xylem	nan	F. sylvatica	-10.11	-95.96
1078	Xylem	nan	F. sylvatica	-9.95	-95.71
1041	Xylem	nan	F. sylvatica	-8.81	-96.34
1041	Xylem	nan	F. sylvatica	-8.86	-94.18
1041	Xylem	nan	F. sylvatica	-10.29	-90.37
1078	Xylem	nan	F. sylvatica	-8.69	-87.31
1078	Xylem	nan	F. sylvatica	-9.7	-95.99
1080	Xylem	nan	F. sylvatica	-7.96	-88.09
1080	Xylem	nan	F. sylvatica	-7.92	-84.38
1080	Xylem	nan	F. sylvatica	-8.11	-84.85
1080	Xylem	nan	F. sylvatica	-7.1	-84.19
1081	Xylem	nan	F. sylvatica	-7.79	-76.86
1081	Xylem	nan	F. sylvatica	-6.99	-72.03
1081	Xylem	nan	F. sylvatica	-8.12	-76.81
1081	Xylem	nan	F. sylvatica	-9	-86.16
1082	Xylem	nan	F. sylvatica	-7.51	-70.36
1082	Xylem	nan	F. sylvatica	-5.78	-64.51
1082	Xylem	nan	F. sylvatica	-8.12	-73.83
1082	Xylem	nan	F. sylvatica	-8.2	-73.13
1083	Xylem	nan	F. sylvatica	-9.66	-84.41
1083	Xylem	nan	F. sylvatica	-10.2	-85.35
1083	Xylem	nan	F. sylvatica	-9.94	-92.05
1083	Xylem	nan	F. sylvatica	-9.77	-85.24
1086	Xylem	nan	F. sylvatica	-10.39	-95.98
1086	Xylem	nan	F. sylvatica	-11.18	-98.58
1086	Xylem	nan	F. sylvatica	-11.94	-101.03
1086	Xylem	nan	F. sylvatica	-10.66	-95.99
1087	Xylem	nan	F. sylvatica	-11.21	-98.99
1087	Xylem	nan	F. sylvatica	-10.59	-85.62
1087	Xylem	nan	F. sylvatica	-10.42	-93.81
1087	Xylem	nan	F. sylvatica	-11.18	-102.04
1090	Xylem	nan	F. sylvatica	-9.56	-89.6
1090	Xylem	nan	F. sylvatica	-9.15	-90.5
1090	Xylem	nan	F. sylvatica	-9.37	-94.03
1093	Xylem	nan	F. sylvatica	-9.33	-89.59
1093	Xylem	nan	F. sylvatica	-10.31	-91.63
1093	Xylem	nan	F. sylvatica	-11.14	-97.12
1094	Xylem	nan	F. sylvatica	-10.27	-89.59
1094	Xylem	nan	F. sylvatica	-10.43	-89.92
1094	Xylem	nan	F. sylvatica	-10.78	-92.72
1094	Xylem	nan	F. sylvatica	-7.78	-80.63
1095	Xylem	nan	F. sylvatica	-10.53	-96.63
1095	Xylem	nan	F. sylvatica	-10.79	-97.17
1095	Xylem	nan	F. sylvatica	-10.71	-94.95
1095	Xylem	nan	F. sylvatica	-11.18	-90.94
1095	Xylem	nan	F. sylvatica	-10.09	-85.25
1096	Xylem	nan	F. sylvatica	-11.2	-94.66
1096	Xylem	nan	F. sylvatica	-9.41	-87.98
1096	Xylem	nan	F. sylvatica	-11.2	-88.5
1096	Xylem	nan	F. sylvatica	-9.26	-91.82
1097	Xylem	nan	F. sylvatica	-11.94	-96.73
1097	Xylem	nan	F. sylvatica	-11.6	-96.25
1097	Xylem	nan	F. sylvatica	-10.65	-88.53
1097	Xylem	nan	F. sylvatica	-9.88	-88.19
1098	Xylem	nan	F. sylvatica	-9.66	-84.41
1098	Xylem	nan	F. sylvatica	-10.04	-89.47
1098	Xylem	nan	F. sylvatica	-9.84	-85.94
1098	Xylem	nan	F. sylvatica	-9.09	-85.92
1104	Xylem	nan	F. sylvatica	-8.98	-69.64
1104	Xylem	nan	F. sylvatica	-9.37	-88.56
1104	Xylem	nan	F. sylvatica	-9.7	-80.78
1104	Xylem	nan	F. sylvatica	-10.62	-86.57
1104	Xylem	nan	F. sylvatica	-10.86	-94.58
1104	Xylem	nan	F. sylvatica	-8.9	-83.3
1104	Xylem	nan	F. sylvatica	-10.55	-97.38
1104	Xylem	nan	F. sylvatica	-8.87	-80.35
1107	Xylem	nan	F. sylvatica	-10.16	-89.74
1107	Xylem	nan	F. sylvatica	-10.12	-88.97
1107	Xylem	nan	F. sylvatica	-10.69	-91.49
1118	Xylem	nan	F. sylvatica	-10.75	-94.58
1118	Xylem	nan	F. sylvatica	-8.77	-87
1118	Xylem	nan	F. sylvatica	-9.15	-90.84
1118	Xylem	nan	F. sylvatica	-9.74	-93.81
1118	Xylem	nan	F. sylvatica	-8.91	-88.91
1118	Xylem	nan	F. sylvatica	-9.11	-79.94
1118	Xylem	nan	F. sylvatica	-8.6	-85.35
1118	Xylem	nan	F. sylvatica	-9.89	-92.41
1108	Xylem	nan	F. sylvatica	-6.76	-75.2
1107	Xylem	nan	F. sylvatica	-7.53	-78.9
1108	Xylem	nan	F. sylvatica	-7.8	-83.9
1108	Xylem	nan	F. sylvatica	-6.13	-64.5
1108	Xylem	nan	F. sylvatica	-6.7	-74.83
1111	Xylem	nan	F. sylvatica	-9.58	-87.77
1111	Xylem	nan	F. sylvatica	-9.05	-87.47
1111	Xylem	nan	F. sylvatica	-9.15	-86.98
1111	Xylem	nan	F. sylvatica	-8.68	-87.03
1114	Xylem	nan	F. sylvatica	-9.61	-95.52
1114	Xylem	nan	F. sylvatica	-11.2	-88
1114	Xylem	nan	F. sylvatica	-7.95	-79.73
1114	Xylem	nan	F. sylvatica	-10.36	-90.47
1116	Xylem	nan	F. sylvatica	-9.07	-90.29
1116	Xylem	nan	F. sylvatica	-8.23	-82.12
1116	Xylem	nan	F. sylvatica	-8.97	-92.32
1116	Xylem	nan	F. sylvatica	-9.65	-90.48
1120	Xylem	nan	F. sylvatica	-8.99	-78.48
1120	Xylem	nan	F. sylvatica	-9.01	-80.58
1120	Xylem	nan	F. sylvatica	-9.31	-84.39
1120	Xylem	nan	F. sylvatica	-8.64	-74.86
1121	Xylem	nan	F. sylvatica	-6.38	-59.17
1124	Xylem	nan	F. sylvatica	-6.17	-52.59
1124	Xylem	nan	F. sylvatica	-6.6	-55.38
1121	Xylem	nan	F. sylvatica	-5.49	-56.02
1124	Xylem	nan	F. sylvatica	-6.13	-46.39
1121	Xylem	nan	F. sylvatica	-7.33	-52.88
1141	Xylem	nan	F. sylvatica	-9.15	-82.49
1141	Xylem	nan	F. sylvatica	-8.89	-80.23
1139	Xylem	nan	F. sylvatica	-10.15	-83.59
1139	Xylem	nan	F. sylvatica	-8.89	-77.85
1139	Xylem	nan	F. sylvatica	-8.09	-69.39
1139	Xylem	nan	F. sylvatica	-7.39	-73.94
1181	Xylem	nan	F. sylvatica	-8	-69.62
1181	Xylem	nan	F. sylvatica	-7.57	-63.34
1181	Xylem	nan	F. sylvatica	-10.35	-84.14
1181	Xylem	nan	F. sylvatica	-7.98	-73.46
1145	Xylem	nan	F. sylvatica	-8.34	-77.86
1145	Xylem	nan	F. sylvatica	-9.02	-85.01
1145	Xylem	nan	F. sylvatica	-8.92	-86.43
1145	Xylem	nan	F. sylvatica	-9.34	-82.85
1142	Xylem	nan	F. sylvatica	-8.57	-73.97
1142	Xylem	nan	F. sylvatica	-8.96	-79.02
1194	Xylem	nan	F. sylvatica	-8.41	-68.31
1194	Xylem	nan	F. sylvatica	-9.01	-80.52
1194	Xylem	nan	F. sylvatica	-9.55	-88.9
1194	Xylem	nan	F. sylvatica	-9.08	-82.19
1197	Xylem	nan	F. sylvatica	-6.93	-77.08
1197	Xylem	nan	F. sylvatica	-7.39	-80.99
1197	Xylem	nan	F. sylvatica	-7.51	-77.78
1197	Xylem	nan	F. sylvatica	-7.85	-88.12
1199	Xylem	nan	F. sylvatica	-6.29	-67.63
1199	Xylem	nan	F. sylvatica	-7.28	-71.13
1199	Xylem	nan	F. sylvatica	-7.23	-75.29
1199	Xylem	nan	F. sylvatica	-6.98	-69.02
1201	Xylem	nan	F. sylvatica	-8.2	-83.88
1201	Xylem	nan	F. sylvatica	-8.32	-83.85
1201	Xylem	nan	F. sylvatica	-7.33	-80.67
1201	Xylem	nan	F. sylvatica	-8.45	-77.55
1141	Xylem	nan	F. sylvatica	-8.21	-83.79
1141	Xylem	nan	F. sylvatica	-8.45	-88.75
1142	Xylem	nan	F. sylvatica	-8.3	-75.05
1121	Xylem	nan	F. sylvatica	-6.25	-68.25
1124	Xylem	nan	F. sylvatica	-5.41	-59.76
1125	Xylem	nan	F. sylvatica	-5.35	-59.43
1125	Xylem	nan	F. sylvatica	-4.58	-55.83
1125	Xylem	nan	F. sylvatica	-5.47	-56.47
1125	Xylem	nan	F. sylvatica	-5.22	-57.98
1137	Xylem	nan	F. sylvatica	-5.14	-54.5
1137	Xylem	nan	F. sylvatica	-6.38	-64.83
1137	Xylem	nan	F. sylvatica	-5.81	-65.12
1137	Xylem	nan	F. sylvatica	-6.85	-72.16
1142	Xylem	nan	F. sylvatica	-8.98	-90.06
1198	Xylem	nan	F. sylvatica	-5.28	-63.68
1198	Xylem	nan	F. sylvatica	-5.44	-63.23
1198	Xylem	nan	F. sylvatica	-5.38	-67.5
1198	Xylem	nan	F. sylvatica	-5.44	-57.38
1202	Xylem	nan	F. sylvatica	-9.76	-90.38
1202	Xylem	nan	F. sylvatica	-9.91	-95.9
1202	Xylem	nan	F. sylvatica	-8.81	-93.78
1202	Xylem	nan	F. sylvatica	-10.27	-101.37
1009	Xylem	nan	P. abies	-7.83	-75.23
1009	Xylem	nan	P. abies	-9.16	-80.93
1009	Xylem	nan	P. abies	-10.45	-82.72
1009	Xylem	nan	P. abies	-9.09	-77.2
1011	Xylem	nan	P. abies	-8.07	-75.33
1011	Xylem	nan	P. abies	-7.96	-66.6
1011	Xylem	nan	P. abies	-8.7	-70.4
1011	Xylem	nan	P. abies	-9.29	-74.07
1029	Xylem	nan	P. abies	-10	-76.09
1029	Xylem	nan	P. abies	-10.02	-83.49
1029	Xylem	nan	P. abies	-8.93	-88.46
1029	Xylem	nan	P. abies	-9.71	-83.47
1033	Xylem	nan	P. abies	-9.48	-72.28
1033	Xylem	nan	P. abies	-7.02	-72.86
1033	Xylem	nan	P. abies	-8.8	-68.7
1033	Xylem	nan	P. abies	-7.97	-68.24
1037	Xylem	nan	P. abies	-8.99	-72.73
1037	Xylem	nan	P. abies	-9.84	-82.46
1037	Xylem	nan	P. abies	-10.29	-84.58
1037	Xylem	nan	P. abies	-8.54	-78
1038	Xylem	nan	P. abies	-9.38	-76.93
1038	Xylem	nan	P. abies	-8.82	-74.72
1038	Xylem	nan	P. abies	-8.15	-71.72
1038	Xylem	nan	P. abies	-8.61	-79.08
1039	Xylem	nan	P. abies	-10.09	-92.96
1039	Xylem	nan	P. abies	-11.78	-93.42
1040	Xylem	nan	P. abies	-11.46	-86.32
1040	Xylem	nan	P. abies	-8.52	-76.83
1039	Xylem	nan	P. abies	-8.49	-79.68
1039	Xylem	nan	P. abies	-10.7	-89.12
1040	Xylem	nan	P. abies	-10.69	-87.85
1040	Xylem	nan	P. abies	-10.24	-87.34
1046	Xylem	nan	P. abies	-6.84	-65.59
1046	Xylem	nan	P. abies	-8.57	-69.78
1046	Xylem	nan	P. abies	-7.49	-66.51
1051	Xylem	nan	P. abies	-9.86	-77.95
1051	Xylem	nan	P. abies	-8.23	-63.37
1051	Xylem	nan	P. abies	-9.7	-67.59
1051	Xylem	nan	P. abies	-9.01	-77.61
1052	Xylem	nan	P. abies	-9.88	-79.02
1052	Xylem	nan	P. abies	-10.05	-78.2
1052	Xylem	nan	P. abies	-10.28	-79.19
1052	Xylem	nan	P. abies	-8.78	-70.32
1054	Xylem	nan	P. abies	-10.78	-85.01
1054	Xylem	nan	P. abies	-7.97	-69.4
1054	Xylem	nan	P. abies	-9.88	-77.92
1054	Xylem	nan	P. abies	-8.34	-69.38
1057	Xylem	nan	P. abies	-8.16	-74.78
1057	Xylem	nan	P. abies	-9.78	-82.24
1057	Xylem	nan	P. abies	-9.26	-78.99
1057	Xylem	nan	P. abies	-9.76	-80.29
1057	Xylem	nan	P. abies	-9.17	-78.5
1060	Xylem	nan	P. abies	-8.38	-71.82
1060	Xylem	nan	P. abies	-9.81	-77.64
1060	Xylem	nan	P. abies	-10.45	-75.91
1060	Xylem	nan	P. abies	-8.8	-73.69
1062	Xylem	nan	P. abies	-9.37	-75.74
1062	Xylem	nan	P. abies	-10.56	-83.23
1062	Xylem	nan	P. abies	-10.18	-82.69
1062	Xylem	nan	P. abies	-10.64	-82.36
1066	Xylem	nan	P. abies	-9.36	-78.62
1066	Xylem	nan	P. abies	-10.36	-81.21
1066	Xylem	nan	P. abies	-9.47	-78.55
1068	Xylem	nan	P. abies	-8.6	-70.31
1068	Xylem	nan	P. abies	-8.75	-74.48
1068	Xylem	nan	P. abies	-9.45	-75.41
1068	Xylem	nan	P. abies	-9.2	-74.83
1069	Xylem	nan	P. abies	-8.26	-71.84
1069	Xylem	nan	P. abies	-9.81	-74.81
1069	Xylem	nan	P. abies	-8.15	-73.06
1069	Xylem	nan	P. abies	-10.12	-83.27
1070	Xylem	nan	P. abies	-8.95	-81.01
1070	Xylem	nan	P. abies	-9.46	-79.3
1070	Xylem	nan	P. abies	-7.88	-73.58
1070	Xylem	nan	P. abies	-7.73	-69.92
1071	Xylem	nan	P. abies	-9.05	-79.82
1071	Xylem	nan	P. abies	-10.02	-79.12
1071	Xylem	nan	P. abies	-7.88	-67.54
1071	Xylem	nan	P. abies	-8.75	-74.01
1073	Xylem	nan	P. abies	-8.44	-72.24
1073	Xylem	nan	P. abies	-7.83	-68.42
1073	Xylem	nan	P. abies	-8.93	-72.44
1073	Xylem	nan	P. abies	-7.86	-61.6
1075	Xylem	nan	P. abies	-9.43	-75.59
1075	Xylem	nan	P. abies	-9.59	-76.13
1075	Xylem	nan	P. abies	-8.98	-69.7
1075	Xylem	nan	P. abies	-5.77	-54.59
1077	Xylem	nan	P. abies	-8.85	-69.41
1077	Xylem	nan	P. abies	-8.27	-67.35
1077	Xylem	nan	P. abies	-8.32	-66.11
1077	Xylem	nan	P. abies	-7.87	-67.53
1079	Xylem	nan	P. abies	-9.76	-81.62
1079	Xylem	nan	P. abies	-10	-81.67
1079	Xylem	nan	P. abies	-9.63	-81.67
1080	Xylem	nan	P. abies	-9.53	-78.98
1080	Xylem	nan	P. abies	-8.16	-72.56
1080	Xylem	nan	P. abies	-8.63	-76.68
1080	Xylem	nan	P. abies	-9.47	-75.39
1081	Xylem	nan	P. abies	-6.8	-66.64
1082	Xylem	nan	P. abies	-8.92	-70.6
1081	Xylem	nan	P. abies	-7.74	-67.62
1081	Xylem	nan	P. abies	-9.09	-76.18
1082	Xylem	nan	P. abies	-9.31	-71.43
1082	Xylem	nan	P. abies	-7.99	-62.17
1082	Xylem	nan	P. abies	-8.59	-70.46
1082	Xylem	nan	P. abies	-8.66	-72.03
1083	Xylem	nan	P. abies	-9.12	-74.88
1083	Xylem	nan	P. abies	-7.9	-65.46
1083	Xylem	nan	P. abies	-7.88	-69.2
1083	Xylem	nan	P. abies	-9.26	-73.16
1084	Xylem	nan	P. abies	-9.01	-76.62
1084	Xylem	nan	P. abies	-9.7	-80.26
1084	Xylem	nan	P. abies	-9.07	-75.94
1084	Xylem	nan	P. abies	-10.08	-78.07
1088	Xylem	nan	P. abies	-8.22	-72.18
1088	Xylem	nan	P. abies	-9.26	-69.65
1088	Xylem	nan	P. abies	-9.17	-74.51
1088	Xylem	nan	P. abies	-9.18	-75.03
1091	Xylem	nan	P. abies	-10.01	-83.67
1091	Xylem	nan	P. abies	-10.22	-84.67
1091	Xylem	nan	P. abies	-9.08	-72.78
1092	Xylem	nan	P. abies	-7.03	-60.27
1092	Xylem	nan	P. abies	-7.25	-69.15
1092	Xylem	nan	P. abies	-7.95	-77.63
1092	Xylem	nan	P. abies	-7.29	-63.34
1093	Xylem	nan	P. abies	-8.1	-67.65
1093	Xylem	nan	P. abies	-8.87	-65.83
1093	Xylem	nan	P. abies	-8.3	-64.48
1094	Xylem	nan	P. abies	-8.86	-79.77
1094	Xylem	nan	P. abies	-8.62	-80.19
1094	Xylem	nan	P. abies	-8.81	-81.9
1094	Xylem	nan	P. abies	-8.77	-76.02
1097	Xylem	nan	P. abies	-10.95	-85.79
1097	Xylem	nan	P. abies	-11.2	-87.48
1097	Xylem	nan	P. abies	-9.47	-77.4
1097	Xylem	nan	P. abies	-10.98	-90.49
1098	Xylem	nan	P. abies	-9.56	-79.41
1098	Xylem	nan	P. abies	-10.79	-86.62
1098	Xylem	nan	P. abies	-10.07	-83.35
1099	Xylem	nan	P. abies	-9.69	-72.97
1099	Xylem	nan	P. abies	-8.54	-70.71
1099	Xylem	nan	P. abies	-9.76	-75.48
1099	Xylem	nan	P. abies	-8.74	-67.81
1100	Xylem	nan	P. abies	-8.72	-74.47
1100	Xylem	nan	P. abies	-9.12	-76.83
1100	Xylem	nan	P. abies	-8.12	-73.19
1100	Xylem	nan	P. abies	-9.75	-80.72
1100	Xylem	nan	P. abies	-8.88	-73.23
1101	Xylem	nan	P. abies	-8.49	-68.17
1101	Xylem	nan	P. abies	-6.98	-56.59
1101	Xylem	nan	P. abies	-7.27	-67.15
1101	Xylem	nan	P. abies	-8.51	-72.65
1102	Xylem	nan	P. abies	-9.36	-69.9
1102	Xylem	nan	P. abies	-9.07	-72.04
1102	Xylem	nan	P. abies	-7.86	-64.57
1102	Xylem	nan	P. abies	-8.54	-68.54
1103	Xylem	nan	P. abies	-9.68	-77.47
1103	Xylem	nan	P. abies	-9.77	-72.61
1103	Xylem	nan	P. abies	-9.78	-85.83
1103	Xylem	nan	P. abies	-10.48	-86.28
1103	Xylem	nan	P. abies	-10.5	-85.32
1104	Xylem	nan	P. abies	-9.01	-70.45
1104	Xylem	nan	P. abies	-8.49	-69.55
1104	Xylem	nan	P. abies	-8.65	-69.41
1104	Xylem	nan	P. abies	-8.64	-70.12
1104	Xylem	nan	P. abies	-8.15	-69.89
1104	Xylem	nan	P. abies	-9.21	-74.1
1104	Xylem	nan	P. abies	-9.45	-76.18
1104	Xylem	nan	P. abies	-8.92	-79.58
1105	Xylem	nan	P. abies	-10.58	-90.98
1105	Xylem	nan	P. abies	-8.87	-77.66
1105	Xylem	nan	P. abies	-10.03	-82.99
1105	Xylem	nan	P. abies	-9.4	-72.76
1105	Xylem	nan	P. abies	-10.01	-82.57
1105	Xylem	nan	P. abies	-9.67	-77.38
1105	Xylem	nan	P. abies	-10.47	-84.88
1106	Xylem	nan	P. abies	-8.67	-72.92
1106	Xylem	nan	P. abies	-9.65	-76.82
1091	Xylem	nan	P. abies	-9.36	-76.59
1136	Xylem	nan	P. abies	-8.07	-66.59
1136	Xylem	nan	P. abies	-10.32	-83.39
1136	Xylem	nan	P. abies	-8.92	-75.6
1136	Xylem	nan	P. abies	-9.67	-82.46
1138	Xylem	nan	P. abies	-9.09	-76.17
1138	Xylem	nan	P. abies	-9.47	-76.05
1138	Xylem	nan	P. abies	-9.59	-73.88
1138	Xylem	nan	P. abies	-9.7	-76.44
1139	Xylem	nan	P. abies	-9.54	-68.36
1139	Xylem	nan	P. abies	-10.15	-87.17
1139	Xylem	nan	P. abies	-9.74	-79.99
1139	Xylem	nan	P. abies	-10.68	-81.92
1140	Xylem	nan	P. abies	-9.26	-74.49
1140	Xylem	nan	P. abies	-10.14	-79.45
1140	Xylem	nan	P. abies	-9.88	-73.58
1140	Xylem	nan	P. abies	-9.56	-72.83
1143	Xylem	nan	P. abies	-8.27	-63.88
1143	Xylem	nan	P. abies	-8.87	-64.87
1143	Xylem	nan	P. abies	-7.75	-63.66
1144	Xylem	nan	P. abies	-10.27	-78.34
1113	Xylem	nan	P. abies	-10.19	-67.33
1113	Xylem	nan	P. abies	-10.22	-78.22
1115	Xylem	nan	P. abies	-8.36	-69.83
1115	Xylem	nan	P. abies	-10.16	-77.46
1115	Xylem	nan	P. abies	-10.23	-82.87
1115	Xylem	nan	P. abies	-10.36	-71.55
1115	Xylem	nan	P. abies	-9.93	-70.73
1116	Xylem	nan	P. abies	-8.61	-61.53
1116	Xylem	nan	P. abies	-9.28	-77.28
1116	Xylem	nan	P. abies	-8.15	-67.54
1116	Xylem	nan	P. abies	-10	-78.73
1117	Xylem	nan	P. abies	-9.31	-72.06
1117	Xylem	nan	P. abies	-9.64	-77.75
1117	Xylem	nan	P. abies	-8.69	-76.06
1117	Xylem	nan	P. abies	-7.21	-66.11
1117	Xylem	nan	P. abies	-9.92	-76.53
1117	Xylem	nan	P. abies	-7.58	-68.75
1117	Xylem	nan	P. abies	-10.97	-81.11
1118	Xylem	nan	P. abies	-10.49	-81.95
1118	Xylem	nan	P. abies	-9.96	-80.78
1118	Xylem	nan	P. abies	-9.55	-78.93
1118	Xylem	nan	P. abies	-8.59	-68.56
1118	Xylem	nan	P. abies	-9.47	-77.9
1118	Xylem	nan	P. abies	-8.92	-71.11
1118	Xylem	nan	P. abies	-10.22	-73.13
1118	Xylem	nan	P. abies	-10.29	-70.1
1120	Xylem	nan	P. abies	-4.43	-47.71
1120	Xylem	nan	P. abies	-7.95	-60.87
1120	Xylem	nan	P. abies	-8.09	-70.3
1120	Xylem	nan	P. abies	-7.43	-59.45
1122	Xylem	nan	P. abies	-6.91	-41.85
1122	Xylem	nan	P. abies	-5.03	-42.74
1122	Xylem	nan	P. abies	-5	-50.5
1122	Xylem	nan	P. abies	-4.91	-31.98
1123	Xylem	nan	P. abies	-6.91	-56.04
1123	Xylem	nan	P. abies	-7.35	-50.82
1123	Xylem	nan	P. abies	-9.43	-73.76
1123	Xylem	nan	P. abies	-6.38	-47.38
1126	Xylem	nan	P. abies	-7.93	-59.11
1126	Xylem	nan	P. abies	-8.3	-62.81
1126	Xylem	nan	P. abies	-5.25	-47.96
1126	Xylem	nan	P. abies	-4.62	-39.74
1128	Xylem	nan	P. abies	-9.4	-78.6
1128	Xylem	nan	P. abies	-11.27	-89.39
1128	Xylem	nan	P. abies	-7.84	-65.41
1129	Xylem	nan	P. abies	-9.43	-74.6
1129	Xylem	nan	P. abies	-9.6	-83.59
1129	Xylem	nan	P. abies	-9.31	-85.23
1130	Xylem	nan	P. abies	-8.48	-76.35
1130	Xylem	nan	P. abies	-8.59	-73.52
1130	Xylem	nan	P. abies	-8.69	-66.03
1131	Xylem	nan	P. abies	-9.5	-79.96
1130	Xylem	nan	P. abies	-8.09	-71.6
1131	Xylem	nan	P. abies	-10.83	-91.37
1131	Xylem	nan	P. abies	-8.91	-74.07
1131	Xylem	nan	P. abies	-10.13	-84.91
1132	Xylem	nan	P. abies	-10.05	-83.01
1132	Xylem	nan	P. abies	-8.74	-78.8
1132	Xylem	nan	P. abies	-11.31	-83.08
1132	Xylem	nan	P. abies	-9.91	-80.06
1133	Xylem	nan	P. abies	-10.07	-80.32
1133	Xylem	nan	P. abies	-8.87	-81.68
1133	Xylem	nan	P. abies	-9.64	-90.58
1133	Xylem	nan	P. abies	-8.77	-70.8
1134	Xylem	nan	P. abies	-11.13	-93.33
1134	Xylem	nan	P. abies	-12.11	-89.14
1134	Xylem	nan	P. abies	-10.17	-79.15
1134	Xylem	nan	P. abies	-11.81	-91.86
1134	Xylem	nan	P. abies	-11.33	-104.22
1134	Xylem	nan	P. abies	-10.37	-102.32
1134	Xylem	nan	P. abies	-10.83	-98.35
1134	Xylem	nan	P. abies	-10.86	-99.16
1135	Xylem	nan	P. abies	-9.72	-80.64
1135	Xylem	nan	P. abies	-10.72	-86.12
1135	Xylem	nan	P. abies	-8.7	-81.34
1135	Xylem	nan	P. abies	-9.86	-91.25
1136	Xylem	nan	P. abies	-7.53	-70.36
1136	Xylem	nan	P. abies	-6.59	-67.02
1136	Xylem	nan	P. abies	-6.46	-65.88
1136	Xylem	nan	P. abies	-6.78	-54.38
1138	Xylem	nan	P. abies	-7.01	-55.12
1138	Xylem	nan	P. abies	-6.32	-56.35
1138	Xylem	nan	P. abies	-6.63	-60.68
1138	Xylem	nan	P. abies	-8.02	-64.15
1139	Xylem	nan	P. abies	-8.13	-57.69
1139	Xylem	nan	P. abies	-8.35	-68.72
1139	Xylem	nan	P. abies	-7.88	-65.68
1139	Xylem	nan	P. abies	-7.62	-68.69
1140	Xylem	nan	P. abies	-7.52	-62.57
1140	Xylem	nan	P. abies	-8.58	-57.78
1140	Xylem	nan	P. abies	-7.58	-60.98
1140	Xylem	nan	P. abies	-8.37	-65.06
1143	Xylem	nan	P. abies	-12.06	-101.26
1143	Xylem	nan	P. abies	-12.53	-106.58
1143	Xylem	nan	P. abies	-12.21	-101.07
1144	Xylem	nan	P. abies	-9.58	-78.53
1144	Xylem	nan	P. abies	-9.58	-77.19
1144	Xylem	nan	P. abies	-9.19	-80.42
1144	Xylem	nan	P. abies	-9.18	-72.54
1195	Xylem	nan	P. abies	-10.27	-83.12
1195	Xylem	nan	P. abies	-8.26	-68.94
1195	Xylem	nan	P. abies	-9.73	-77.72
1195	Xylem	nan	P. abies	-9.48	-73.29
1196	Xylem	nan	P. abies	-9.44	-77.42
1196	Xylem	nan	P. abies	-5.19	-66.44
1196	Xylem	nan	P. abies	-8.25	-75.4
1196	Xylem	nan	P. abies	-7.29	-66.76
1200	Xylem	nan	P. abies	-7.72	-77.29
1200	Xylem	nan	P. abies	-10.29	-87.4
1200	Xylem	nan	P. abies	-10.75	-88.09
1200	Xylem	nan	P. abies	-9.45	-78.44
1452	Xylem	nan	P. abies	-10.45	-85.86
1452	Xylem	nan	P. abies	-8.82	-83.89
1452	Xylem	nan	P. abies	-10.29	-79.88
1452	Xylem	nan	P. abies	-9.47	-77.33
1003	Xylem	nan	Q. robur	-8.48	-79.31
1003	Xylem	nan	Q. robur	-8.19	-87.03
1003	Xylem	nan	Q. robur	-9.08	-84.26
1003	Xylem	nan	Q. robur	-9.07	-82.88
1006	Xylem	nan	Q. robur	-8.04	-79.14
1006	Xylem	nan	Q. robur	-9.74	-81.78
1006	Xylem	nan	Q. robur	-8.3	-80.3
1006	Xylem	nan	Q. robur	-9.42	-85.1
1010	Xylem	nan	Q. robur	-8.76	-86.83
1010	Xylem	nan	Q. robur	-7.06	-81.2
1010	Xylem	nan	Q. robur	-7.8	-78.14
1010	Xylem	nan	Q. robur	-7.97	-79.66
1011	Xylem	nan	Q. robur	-8.32	-82.05
1011	Xylem	nan	Q. robur	-7.96	-74.86
1011	Xylem	nan	Q. robur	-8.27	-80.63
1011	Xylem	nan	Q. robur	-7.75	-77.65
1021	Xylem	nan	Q. robur	-9.67	-84.2
1021	Xylem	nan	Q. robur	-9	-81.98
1021	Xylem	nan	Q. robur	-10.16	-88.12
1028	Xylem	nan	Q. robur	-8.47	-75.9
1028	Xylem	nan	Q. robur	-8.85	-86.72
1028	Xylem	nan	Q. robur	-8.65	-85.58
1028	Xylem	nan	Q. robur	-9.6	-88.06
1050	Xylem	nan	Q. robur	-7.06	-78.89
1050	Xylem	nan	Q. robur	-8.56	-79.72
1050	Xylem	nan	Q. robur	-9.43	-81.34
1050	Xylem	nan	Q. robur	-8.15	-77.95
1061	Xylem	nan	Q. robur	-10.16	-83.03
1061	Xylem	nan	Q. robur	-10.07	-81.34
1061	Xylem	nan	Q. robur	-8.89	-80.99
1096	Xylem	nan	Q. robur	-8.58	-78.68
1096	Xylem	nan	Q. robur	-9.1	-79.55
1096	Xylem	nan	Q. robur	-8.95	-78.85
1096	Xylem	nan	Q. robur	-8.73	-86.45
1155	Xylem	nan	Q. robur	-9.77	-86.42
1155	Xylem	nan	Q. robur	-7.23	-71.34
1155	Xylem	nan	Q. robur	-10.34	-93.57
1155	Xylem	nan	Q. robur	-7.7	-75.12
1156	Xylem	nan	Q. robur	-9.29	-78.81
1156	Xylem	nan	Q. robur	-9.23	-74.18
1156	Xylem	nan	Q. robur	-9.4	-76.77
1156	Xylem	nan	Q. robur	-9.21	-79.16
1157	Xylem	nan	Q. robur	-8.84	-86.39
1157	Xylem	nan	Q. robur	-8.3	-79.32
1157	Xylem	nan	Q. robur	-8.55	-77.75
1067	Xylem	nan	Q. robur	-9.45	-80.37
1067	Xylem	nan	Q. robur	-9.33	-78.46
1067	Xylem	nan	Q. robur	-9.47	-79.9
1067	Xylem	nan	Q. robur	-8.7	-77.05
1021	Xylem	nan	Q. robur	-7.66	-71.57
1157	Xylem	nan	Q. robur	-8.55	-77.63
1158	Xylem	nan	Q. robur	-8.4	-78.01
1158	Xylem	nan	Q. robur	-8.87	-79.89
1158	Xylem	nan	Q. robur	-9.81	-83.76
1158	Xylem	nan	Q. robur	-7.67	-75.75
1161	Xylem	nan	Q. robur	-7.85	-77.91
1161	Xylem	nan	Q. robur	-8.57	-73.81
1161	Xylem	nan	Q. robur	-8.48	-76.84
1161	Xylem	nan	Q. robur	-7.22	-67.14
1162	Xylem	nan	Q. robur	-9.94	-80.76
1162	Xylem	nan	Q. robur	-5.74	-63.54
1162	Xylem	nan	Q. robur	-6.93	-75.02
1162	Xylem	nan	Q. robur	-9.96	-89.52
1164	Xylem	nan	Q. robur	-9.61	-85.75
1164	Xylem	nan	Q. robur	-8.99	-83
1164	Xylem	nan	Q. robur	-9.61	-85.13
1164	Xylem	nan	Q. robur	-11.03	-88.26
1165	Xylem	nan	Q. robur	-10.46	-88.95
1165	Xylem	nan	Q. robur	-9.74	-84.09
1165	Xylem	nan	Q. robur	-10.22	-88.43
1165	Xylem	nan	Q. robur	-9.95	-87.77
1165	Xylem	nan	Q. robur	-9.9	-85.44
1166	Xylem	nan	Q. robur	-8.23	-76.85
1166	Xylem	nan	Q. robur	-8.19	-77.52
1166	Xylem	nan	Q. robur	-10.14	-91.56
1166	Xylem	nan	Q. robur	-9.7	-77.24
1167	Xylem	nan	Q. robur	-9.78	-84.9
1167	Xylem	nan	Q. robur	-9.3	-79.64
1167	Xylem	nan	Q. robur	-8.4	-78.09
1167	Xylem	nan	Q. robur	-10.03	-83.21
1168	Xylem	nan	Q. robur	-8.69	-78.19
1168	Xylem	nan	Q. robur	-8.16	-72.58
1168	Xylem	nan	Q. robur	-8.51	-72.78
1168	Xylem	nan	Q. robur	-8.1	-71.97
1169	Xylem	nan	Q. robur	-9.19	-79.66
1169	Xylem	nan	Q. robur	-9.14	-82.07
1169	Xylem	nan	Q. robur	-9.34	-79.4
1169	Xylem	nan	Q. robur	-9.38	-80.37
1159	Xylem	nan	Q. robur	-10.44	-88.46
1159	Xylem	nan	Q. robur	-10.95	-87.65
1159	Xylem	nan	Q. robur	-10.12	-89.43
1159	Xylem	nan	Q. robur	-10.11	-88.06
1160	Xylem	nan	Q. robur	-8.61	-81.81
1160	Xylem	nan	Q. robur	-8.72	-82.43
1160	Xylem	nan	Q. robur	-8.27	-79.47
1160	Xylem	nan	Q. robur	-9.21	-86.08
1163	Xylem	nan	Q. robur	-9.42	-87.46
1162	Xylem	nan	Q. robur	-9.02	-85.67
1163	Xylem	nan	Q. robur	-10.15	-91.67
1163	Xylem	nan	Q. robur	-8.62	-83.82
1170	Xylem	nan	Q. robur	-8.52	-76.96
1170	Xylem	nan	Q. robur	-9.52	-83.99
1170	Xylem	nan	Q. robur	-10.39	-85.45
1170	Xylem	nan	Q. robur	-10.95	-93.11
1171	Xylem	nan	Q. robur	-5.45	-56.95
1171	Xylem	nan	Q. robur	-7.87	-77.52
1171	Xylem	nan	Q. robur	-8.2	-72.37
1171	Xylem	nan	Q. robur	-8.46	-74.14
1172	Xylem	nan	Q. robur	-10.68	-87.79
1172	Xylem	nan	Q. robur	-10.76	-89.92
1172	Xylem	nan	Q. robur	-10.39	-87.17
1172	Xylem	nan	Q. robur	-10.29	-92.06
1173	Xylem	nan	Q. robur	-8.58	-77.12
1173	Xylem	nan	Q. robur	-9.71	-84.83
1173	Xylem	nan	Q. robur	-10.36	-85.56
1173	Xylem	nan	Q. robur	-10.03	-81.72
1174	Xylem	nan	Q. robur	-8.79	-83.2
1174	Xylem	nan	Q. robur	-8	-73.72
1174	Xylem	nan	Q. robur	-9.73	-88.76
1174	Xylem	nan	Q. robur	-8.59	-76.5
1175	Xylem	nan	Q. robur	-9.62	-87.71
1175	Xylem	nan	Q. robur	-9.17	-83.69
1175	Xylem	nan	Q. robur	-9.53	-82.19
1176	Xylem	nan	Q. robur	-10.81	-80.85
1176	Xylem	nan	Q. robur	-8.97	-74.72
1176	Xylem	nan	Q. robur	-9.63	-69.72
1176	Xylem	nan	Q. robur	-8.61	-74.28
1177	Xylem	nan	Q. robur	-8.24	-75.99
1177	Xylem	nan	Q. robur	-9.27	-79.97
1177	Xylem	nan	Q. robur	-9.6	-76.44
1177	Xylem	nan	Q. robur	-9.31	-71.06
1178	Xylem	nan	Q. robur	-11.94	-103.96
1178	Xylem	nan	Q. robur	-11	-95.66
1178	Xylem	nan	Q. robur	-12.09	-102
1178	Xylem	nan	Q. robur	-10.9	-89.39
1178	Xylem	nan	Q. robur	-11.35	-103.21
1178	Xylem	nan	Q. robur	-9.69	-95.72
1178	Xylem	nan	Q. robur	-9.96	-99.89
1178	Xylem	nan	Q. robur	-10.39	-95.86
1179	Xylem	nan	Q. robur	-11.43	-96.36
1179	Xylem	nan	Q. robur	-9.15	-88.82
1179	Xylem	nan	Q. robur	-9.79	-94.23
1179	Xylem	nan	Q. robur	-7.49	-86.33
1179	Xylem	nan	Q. robur	-9.01	-87.54
1179	Xylem	nan	Q. robur	-9.07	-88.95
1179	Xylem	nan	Q. robur	-8.46	-84.14
1179	Xylem	nan	Q. robur	-8.99	-89.4
1180	Xylem	nan	Q. robur	-8.49	-76.42
1180	Xylem	nan	Q. robur	-8.61	-81.06
1180	Xylem	nan	Q. robur	-8.94	-88.53
1180	Xylem	nan	Q. robur	-9.42	-84.31
1181	Xylem	nan	Q. robur	-7.35	-68.13
1181	Xylem	nan	Q. robur	-7.01	-61.75
1181	Xylem	nan	Q. robur	-7.54	-62.89
1181	Xylem	nan	Q. robur	-8.03	-64.48
1182	Xylem	nan	Q. robur	-9.03	-75.82
1182	Xylem	nan	Q. robur	-7.41	-78.05
1182	Xylem	nan	Q. robur	-6.04	-71.59
1182	Xylem	nan	Q. robur	-5.2	-62.8
1183	Xylem	nan	Q. robur	-10.43	-83.95
1183	Xylem	nan	Q. robur	-10.8	-89.29
1183	Xylem	nan	Q. robur	-10	-91.56
1183	Xylem	nan	Q. robur	-10.92	-84.12
1184	Xylem	nan	Q. robur	-9.11	-70.16
1184	Xylem	nan	Q. robur	-6.97	-67.56
1184	Xylem	nan	Q. robur	-6.68	-67.67
1184	Xylem	nan	Q. robur	-5.97	-65.2
1184	Xylem	nan	Q. robur	-5.18	-62.28
1184	Xylem	nan	Q. robur	-7.72	-66.72
1184	Xylem	nan	Q. robur	-7.6	-69.76
1184	Xylem	nan	Q. robur	-9.05	-69.64
1185	Xylem	nan	Q. robur	-7.39	-67.32
1185	Xylem	nan	Q. robur	-7.61	-67.79
1185	Xylem	nan	Q. robur	-6.8	-67.91
1185	Xylem	nan	Q. robur	-7.25	-64.24
1185	Xylem	nan	Q. robur	-7.34	-65.43
1185	Xylem	nan	Q. robur	-6.62	-69.81
1185	Xylem	nan	Q. robur	-7.39	-69.35
1188	Xylem	nan	Q. robur	-9.13	-83.71
1188	Xylem	nan	Q. robur	-9.05	-85.23
1188	Xylem	nan	Q. robur	-6.63	-74.868
1188	Xylem	nan	Q. robur	-8.26	-88.07
1189	Xylem	nan	Q. robur	-7.98	-79.46
1189	Xylem	nan	Q. robur	-7.74	-71.67
1189	Xylem	nan	Q. robur	-8.72	-82.42
1189	Xylem	nan	Q. robur	-9.74	-79.17
1189	Xylem	nan	Q. robur	-8.01	-87.62
1193	Xylem	nan	Q. robur	-7.9	-72.25
1193	Xylem	nan	Q. robur	-8.57	-73.55
1193	Xylem	nan	Q. robur	-7.35	-67.28
1193	Xylem	nan	Q. robur	-8.72	-68.74
1186	Xylem	nan	Q. robur	-7.03	-64.96
1186	Xylem	nan	Q. robur	-8.46	-85.9
1186	Xylem	nan	Q. robur	-8.49	-77.83
1187	Xylem	nan	Q. robur	-4.89	-46.47
1186	Xylem	nan	Q. robur	-8.07	-77.17
1187	Xylem	nan	Q. robur	-5.16	-50.53
1187	Xylem	nan	Q. robur	-5.85	-51.46
1187	Xylem	nan	Q. robur	-4.74	-53.65
1190	Xylem	nan	Q. robur	-10.6	-95.49
1190	Xylem	nan	Q. robur	-10.7	-96.78
1190	Xylem	nan	Q. robur	-11.17	-98.78
1190	Xylem	nan	Q. robur	-10.95	-91.21
1191	Xylem	nan	Q. robur	-10.16	-94.39
1191	Xylem	nan	Q. robur	-10.49	-89.64
1191	Xylem	nan	Q. robur	-9.05	-86.81
1191	Xylem	nan	Q. robur	-10.98	-98.41
1192	Xylem	nan	Q. robur	-6.77	-62.13
1192	Xylem	nan	Q. robur	-5.74	-54.44
1192	Xylem	nan	Q. robur	-6.98	-59.99
1192	Xylem	nan	Q. robur	-4.58	-46.53
1093	Xylem	nan	F. sylvatica	-9.06	-82.61
1068	Xylem	nan	P. abies	-9.02	-79.88
