# Supplementary material for: Seasonal origins of soil water used by trees
Source: Copernicus journal article supplement (doi:10.5194/hess-23-1199-2019), 2019-03-01
Supplement: Supplementary file 3 [file hess-23-1199-2019-supplement.zip › Data-SiteLocations.csv]

site.number	elevation (m)	lat (dec)	long (dec)
1001	254.6990051	47.5767429	7.613743004
1002	256.0020142	47.57583673	7.618192356
1003	453.901001	47.59380228	7.679809241
1004	474.8009949	47.57434127	7.674803556
1005	423.6019897	47.5659717	7.654501995
1006	483.7980042	47.57281059	7.675660594
1007	272.7999878	47.5420209	7.644841648
1008	337.303009	47.53505403	7.540962213
1009	361.0029907	47.53835589	7.516332003
1010	392.7030029	47.51741038	7.49944098
1011	383.0029907	47.50223022	7.580118331
1012	362.2980042	47.5161372	7.634120805
1013	360.9020081	47.51519408	7.633387192
1014	417.696991	47.51435622	7.673010657
1015	451.3980103	47.47791706	7.719547122
1016	518.3010254	47.44509276	7.717849363
1017	652.5029907	47.3873375	7.683643276
1018	589.0969849	47.43767027	7.785218104
1019	637.4970093	47.39442021	7.781095792
1020	952.2979736	47.36728886	7.800250133
1021	539.4019775	47.46992582	7.824225978
1022	711.4990234	47.48539393	7.86328
1023	581.5020142	47.43394641	7.898791994
1024	698.302002	47.47855026	7.922659237
1025	560.8040161	47.47055324	7.931473771
1026	768.2039795	47.42460176	7.929325893
1027	721.1989746	47.41317491	7.388684842
1028	395.1010132	47.43921465	7.550455364
1029	421.3999939	47.43826807	7.552706935
1030	444.9020081	47.49422183	7.430874188
1031	784.3969727	47.46088688	7.49248029
1032	592.3029785	47.38927878	7.567899014
1033	592.3029785	47.38914268	7.568958205
1034	440.1960144	47.41029255	7.556423109
1035	657.1060181	47.42872754	7.596689315
1036	651.1010132	47.48483769	7.659480152
1037	842.7990112	47.37669285	7.852417534
1038	1241.500977	47.22284734	7.377442154
1039	508.6990051	47.17904968	7.64753303
1040	620.3989868	47.13402822	7.491229125
1041	658.697998	47.45936399	7.47722807
1042	648.1929932	47.4288205	7.594462937
1043	702.4039917	47.48353395	7.659275731
1044	375	47.52935869	7.755871327
1045	428.3959961	47.53938158	7.844120717
1046	287.0979919	47.5802334	7.899061902
1047	291.2980042	47.58532108	7.862018166
1048	440.1019897	47.53949117	7.851293636
1049	707.9970093	47.5224407	8.072032722
1050	543.1019897	47.46286542	8.069931521
1051	509.1000061	47.56079313	8.338438219
1052	540.0969849	47.29053449	7.961011771
1053	485.302002	47.26597222	8.357788618
1054	499.6019897	47.26854392	8.356775654
1055	474.79599	47.46428979	8.192633421
1056	432.4039917	47.46558585	8.200742617
1057	420.6000061	47.46566354	8.202600647
1060	588.0999756	47.63845057	8.819965364
1061	540.802002	47.62151814	8.545001
1062	535.098999	47.62336543	8.544640379
1063	465.3039856	47.51468192	8.494717718
1064	461.4989929	47.51597501	8.49593831
1065	532.5040283	47.50629596	8.743851806
1066	519.4030151	47.50968764	8.742209152
1067	613.2009888	47.47893231	8.68844927
1068	628.302002	47.47769959	8.677607042
1069	482.2990112	47.42430501	8.591404663
1070	662.9030151	47.38584853	8.568851863
1071	768.5980225	47.33463869	8.500615613
1072	657.6010132	47.30320044	8.852686243
1073	624.5009766	47.30309105	8.854270339
1074	1033.597046	47.2935946	8.890909746
1075	1010.700989	47.29401094	8.889995474
1076	571.2000122	47.26415864	8.705626315
1077	606.6970215	47.26376329	8.708854554
1078	634.3010254	47.55003627	8.593201431
1079	613.098999	47.42221075	8.460148878
1080	484.598999	47.41932051	8.647887595
1081	520.6959839	47.21135159	8.496319392
1082	1009.302002	47.11337667	8.652380865
1083	978.8029785	47.12872862	8.534560089
1083	980.0999756	47.12914113	8.533751304
1084	1149.204956	47.09508345	8.589856272
1085	708.9039917	47.13442318	8.51740775
1086	699.9039917	47.13717748	8.516276765
1087	933.5949707	47.14843404	8.543468312
1088	914.7960205	47.14694497	8.543965003
1090	482.9960022	47.24447034	7.784890274
1091	604.3029785	47.19118104	7.825780323
1092	1160.598999	47.19067374	7.058517556
1093	1111.79895	47.26913458	7.289646408
1094	896.6929932	47.13542908	7.208491872
1095	663.2969971	47.13097927	7.209829013
1096	501.7950134	47.12968191	7.213327232
1097	734.697998	47.02151898	7.343933442
1098	538.401001	46.96366717	7.397971588
1099	1175.30896	46.75757125	7.370640207
1100	1173.405029	46.7558162	7.369071798
1101	1396.208984	46.67457775	7.521885643
1102	1438.098022	46.63959315	7.510012128
1103	1481.410034	46.58149506	7.327678037
1104	653.3939819	46.65118634	7.754701394
1105	1831.828003	46.57495608	7.930036748
1106	1386.814941	46.63515259	7.762377991
1107	957.1010132	46.88999667	7.761943238
1108	844.9050293	46.68112446	8.243330898
1109	889.5100098	46.6776429	8.245893076
1110	552.2999878	47.67267535	8.781638182
1111	676.7009888	47.65644511	9.013942867
1112	437.098999	47.55997556	9.334963038
1113	714.5960083	47.50441516	9.060020886
1114	747.0009766	47.43859636	8.916675082
1115	756.2009888	47.43894081	8.917877944
1116	613.0009766	47.56672638	8.976327336
1117	1014.395996	46.66267187	7.00445371
1118	937.0910034	46.72993654	7.267129049
1120	758.302002	46.47442126	8.79785657
1121	721.3920288	45.85901123	9.035753557
1122	815.5960083	45.85996293	9.038421085
1123	1565.894043	46.50326054	8.747700567
1124	678.6019897	45.94828582	8.922342621
1125	886.6790161	46.02489911	8.841245688
1126	806.7119751	46.02838792	8.885509041
1127	1142.810059	46.11794673	8.903408677
1128	555.8980103	46.79002365	8.675879314
1129	1272.11499	46.77969263	8.686904679
1130	1702.118042	46.78104659	8.698788205
1131	1597.886963	46.66200989	8.580300084
1132	1360.522949	46.87142813	9.865146868
1133	1661.090942	46.81232602	9.857566213
1134	1565.312012	46.6881597	9.663938701
1135	1750.803955	46.60184316	10.44546012
1136	1404.910034	46.35325051	9.594325378
1137	891.8049927	47.2887865	9.427282714
1138	945.901001	47.31781463	9.408254022
1139	1133.300049	46.91231686	6.465668678
1140	1088.004028	46.95452602	6.511281095
1141	452.7019958	47.49112488	7.191295681
1142	587.2949829	47.23759644	6.946032848
1143	1425.02002	46.13671436	7.462835018
1144	643.8969727	47.42899303	7.593244081
1145	548.302002	47.44705973	7.722672505
1155	272.7999878	47.54202101	7.644775238
1156	432.6040039	47.49075907	7.429481418
1157	337.303009	47.53487374	7.541426677
1158	457.098999	47.46357203	8.192357994
1159	615.802002	47.56638079	8.97525406
1160	437.098999	47.56023008	9.335902483
1161	290.9979858	47.5849985	7.876239141
1162	379.4020081	47.4357133	8.255063775
1163	585.2999878	47.53033882	8.384669106
1164	434.3989868	47.29829572	7.815979504
1165	470.9979858	47.20500911	7.441144921
1166	639.197998	47.21940064	7.43956136
1167	487.7019958	47.09801807	7.537559511
1168	526.3989868	46.91919974	7.215062418
1169	447.7019958	47.02449862	7.092290457
1170	503.302002	47.09218075	7.351315875
1171	370.6990051	47.61952774	8.614800267
1172	402.3009949	47.61309476	8.671322428
1173	573.7009888	47.67449745	8.64851252
1174	405.3989868	47.68756957	8.713014895
1175	434.4979858	47.19533211	8.502007435
1176	559.901001	46.92533943	7.183000091
1177	526.3980103	47.43971456	7.778271634
1178	675.117981	46.23058162	7.333512994
1179	622.1079712	46.59463649	6.441758552
1180	708.598999	46.84714429	6.659979442
1181	587.0050049	46.84064246	6.64329293
1182	536.5020142	46.92132241	6.799389136
1183	529.1030273	46.92161926	6.80424345
1184	431.8999939	46.16049659	6.134825769
1185	458.803009	46.21148278	6.006342125
1186	610.9860229	46.34865284	8.60749438
1187	412.6010132	45.96218589	8.884339518
1188	554.0029907	47.76067751	8.616334463
1189	582.901001	47.65527007	8.494188071
1190	647.7189941	46.83767361	9.432642505
1191	1063.401001	46.76942043	9.437843196
1192	838.4910278	46.37859587	9.226282393
1193	440.9989929	47.49014482	7.195679071
1194	577.8740234	47.21707022	8.275021261
1195	612.1970215	47.14729825	8.049632138
1196	660.302002	47.1878587	8.197704906
1197	562.7979736	47.1266184	8.207367856
1198	512.1989746	46.96971276	8.358289672
1199	544.2890015	46.85986664	8.177611183
1200	672.6079712	46.87927188	8.667238913
1201	499.4089966	47.20334958	8.899798182
1202	701.9940186	47.10087665	7.151272476
1452	499.196991	47.41989814	8.648563372
