# Supplementary material for: Seasonal origins of soil water used by trees
Source: Copernicus journal article supplement (doi:10.5194/hess-23-1199-2019), 2019-03-01
Supplement: Supplementary file 3 [file hess-23-1199-2019-supplement.zip › Data-SoilCharacteristics.csv]

site.number	layer.from (cm)	layer.to (cm)	class (see Bodenkundliche Kartieranleitung 1988)	horizon (see Bodenkundliche Kartieranleitung 1988)	stones (percent volume)	root density (see Bodenkundliche Kartieranleitung 1988)	wetness (see Bodenkundliche Kartieranleitung 1988)	clay (percent)	silt (percent)	sand (percent)
1001	0	5	Ls4	jYAh	25	5	0	21	21.5	57.5
1001	5	15	Lsu	jYAh	25	5	0	20	45	35
1001	15	40	Uls	jYAh	25	4	0	12.5	57.5	30
1002	0	15	Ls3	jYAh	25	4	0	20.5	34.5	45
1002	15	45	Ls3	GojYI	20	3	0	20.5	34.5	45
1002	45	100	Su2	jYII	5	2	0	2.5	17.5	80
1003	0	5	Tu3	Ah oben	30	5	0	40	50	10
1003	5	30	Tu3	Ah unten	50	4	0	40	50	10
1003	30	60	Tu3	Bv	80	2.5	0	40	50	10
1004	0	5	U	Ah	0	3	1	3.8	86.7	9.5
1004	5	15	U	Alh	0	3	1	3.8	86.7	9.5
1004	15	50	U	(Sw)Al	5	1	1	3.8	86.7	9.5
1004	50	105	Tu2	(Sd)Bt	0	1	1	55	37.5	7.5
1004	105	120	T	Bt	0	nan	1	82.5	8.8	8.8
1005	0	5	Uls	Ah	10	5	0	12.5	57.5	30
1005	5	15	Uls	Ah	10	5	0	12.5	57.5	30
1005	15	30	Uls	Ah	10	4	0	12.5	57.5	30
1005	30	40	Uls	AhCv	60	4	0	12.5	57.5	30
1006	0	13	Lsu	Ah	0	2	0	20	45	35
1006	13	40	Lsu	Al	0	2	0	20	45	35
1006	40	50	T	Bt	0	2	0	82.5	8.8	8.8
1006	50	60	T	Bt	0	2	0	82.5	8.8	8.8
1006	60	100	T	BtCv	5	0	0	82.5	8.8	8.8
1007	0	5	Ls3	Ah	40	4	0	20.5	34.5	45
1007	5	18	Ls3	AhBv	40	4	0	20.5	34.5	45
1007	18	55	Ls3	Bv	40	4	0	20.5	34.5	45
1007	55	100	Ls3	BvBt	50	4.5	0	20.5	34.5	45
1008	0	5	U	Ah	0	6	3	3.8	86.7	9.5
1008	5	20	U	Alh	0	5	3	3.8	86.7	9.5
1008	20	30	U	Al	0	3	3	3.8	86.7	9.5
1008	30	55	U	Bt	0	3	3	3.8	86.7	9.5
1008	55	115	Lu	SdBt	0	0.5	3	23.5	60	16.5
1009	0	5	Lt2	Ah	0	3	3	30	42.5	27.5
1009	5	10	Lt2	AhAl	0	3	3	30	42.5	27.5
1009	10	30	Lt2	Al	0	1	3	30	42.5	27.5
1009	30	50	Tl	Bt	0	1	3	55	30	15
1009	50	95	Tl	SdBt	0	1	3	55	30	15
1009	95	120	Ul3	GorCv	0	0	3	14.5	75.5	10
1010	0	7.5	U	Ah	0	6	0	3.8	86.7	9.5
1010	7.5	35	U	Al	0	2.5	0	3.8	86.7	9.5
1010	35	50	Lt2	BvBt	0	1	0	30	42.5	27.5
1010	50	110	Lt2	SdBt	0	1	0	30	42.5	27.5
1010	110	120	U	Cv	0	0	0	3.8	86.7	9.5
1011	0	5	Us	Ah	0	5	3	4	65	31
1011	5	20	Us	AhAl	0	5	3	4	65	31
1011	20	50	Us	SwAl	0	3	3	4	65	31
1011	50	100	Tu3	SdBt	0	0	3	40	50	10
1012	0	8	Ul3	Ah	0	4	3	14.5	75.5	10
1012	8	50	U	(Sw)Al	0	1.5	3	3.8	86.7	9.5
1012	50	100	T	SdBt	0	0	3	82.5	8.8	8.8
1013	0	2	Ul3	Ah	0	6	2	14.5	75.5	10
1013	2	25	U	Al	20	4.5	2	3.8	86.7	9.5
1013	25	70	Ul3	BvAl	0	1.5	2	14.5	75.5	10
1013	70	100	Tu4	SdBt	0	0	2	30	60	10
1014	0	10	Lu	Ah	0	2.5	1	23.5	60	16.5
1014	10	20	Lu	Alh	0	2.5	1	23.5	60	16.5
1014	20	40	Lu	BvAl	0	2.5	1	23.5	60	16.5
1014	40	90	Lu	BvBt	0	0	1	23.5	60	16.5
1014	90	130	Ltu	SdBt	0	0	1	37.5	52.5	10
1015	0	7.5	Tu4	Ah	5	4	0	30	60	10
1015	7.5	25	Lt3	BvAh	50	4	0	40	40	20
1015	25	55	Lt3	BvCv	50	4	0	40	40	20
1015	55	80	Us	Cv	80	2	0	4	65	31
1016	0	10	Lt3	Ah	0	5	0	40	40	20
1016	10	25	Tl	BvAh	0	2.5	0	55	30	15
1016	25	65	Tl	BvCv	65	1	0	55	30	15
1017	0	5	Ul4	Ah oben	5	5	0	22	72	6
1017	5	15	Ul4	Ah unten	5	5	0	22	72	6
1017	15	25	Ul4	AhBv	5	5	0	22	72	6
1017	25	45	Lu	Bv	50	3	0	23.5	60	16.5
1017	45	110	Ul2	Cv	80	1.5	0	10	76.5	13.5
1018	0	10	Tu2	Ah	0	4	0	55	37.5	7.5
1018	10	20	Tu2	AhBv	50	3	0	55	37.5	7.5
1018	20	30	Lt3	BvCv	50	3	0	40	40	20
1018	30	100	Tl	Cv	80	1	0	55	30	15
1019	0	10	Ul3	Ahoben	70	5	0	14.5	75.5	10
1019	10	20	Ul3	Ahunten	70	5	0	14.5	75.5	10
1019	20	25	Uls	AhBv	80	3.5	0	12.5	57.5	30
1019	25	50	Uls	BvCv	80	3.5	0	12.5	57.5	30
1019	50	75	Us	Cv	95	0	0	4	65	31
1020	0	5	Lu	Ah oben	10	4	0	23.5	60	16.5
1020	5	15	Lu	Ah oben	10	4	0	23.5	60	16.5
1020	15	30	Lu	AhBv	20	4	0	23.5	60	16.5
1020	30	40	Ltu	Bt	40	3	0	37.5	52.5	10
1020	40	70	nan	Cv I	40	nan	0	nan	nan	nan
1020	70	95	nan	Cv II	100	nan	0	nan	nan	nan
1021	0	3	Lu	Ah oben	30	5	0	23.5	60	16.5
1021	3	15	Lu	Ah unten	30	5	0	23.5	60	16.5
1021	15	25	Lt3	Bv	50	4	0	40	40	20
1021	25	35	Lt3	BvCv	50	4	0	40	40	20
1021	35	60	Lt3	Cv	50	4	0	40	40	20
1021	60	90	Us	Cv	50	3	0	4	65	31
1022	0	5	Lt3	Ah	10	5	0	40	40	20
1022	5	20	Lt3	AhBv	50	3	0	40	40	20
1022	20	40	Lt3	Bv	80	3	0	40	40	20
1022	40	50	Lt3	Cv	100	0	0	40	40	20
1023	0	5	Ul3	Ah	0	5	2	14.5	75.5	10
1023	5	15	Ul3	AhAl	0	4	2	14.5	75.5	10
1023	15	50	Ul4	BvAl	0	3	2	22	72	6
1023	50	70	Lu	BvBt	0	1.5	2	23.5	60	16.5
1023	70	110	Lu	SdBt	0	0	2	23.5	60	16.5
1024	0	3	Lt3	Ah	0	5	0	40	40	20
1024	3	10	Tl	AhBv	5	4	0	55	30	15
1024	10	25	Tl	(Bv)Cv	25	3	0	55	30	15
1024	25	75	Tl	Cv	50	2	0	55	30	15
1024	75	100	Tu3	Cv/2	50	0	0	40	50	10
1025	0	5	Ul3	Ah	80	6	0	14.5	75.5	10
1025	5	30	Lsu	BvAh	80	4	0	20	45	35
1025	30	60	Sl2	BvCv	80	3	0	6.5	15	78.5
1025	60	80	nan	Cv	100	0	0	nan	nan	nan
1026	0	5	Ut3	Ah oben	20	4	0	13.5	68.5	18
1026	5	20	Lu	Ah unten	80	4	0	23.5	60	16.5
1026	20	35	Uls	Bv	80	2	0	12.5	57.5	30
1026	35	70	Uls	Cv	80	1	0	12.5	57.5	30
1027	0	20	Lt3	Ah	15	5	0	40	40	20
1027	20	45	Lt3	BvCv	50	2	0	40	40	20
1027	45	100	Tu3	Cv	50	0	0	40	50	10
1028	0	3	U	Ah	0	5	0	3.8	86.7	9.5
1028	3	10	U	Al	0	4	0	3.8	86.7	9.5
1028	10	40	Lu	BvAl	0	3	0	23.5	60	16.5
1028	40	50	T	BvBt	30	1.5	0	82.5	8.8	8.8
1028	50	100	T	Bt	30	1.5	0	82.5	8.8	8.8
1029	0	2	Lu	Ah	0	5	0	23.5	60	16.5
1029	2	10	Ul4	AhAl	0	2	0	22	72	6
1029	10	55	Ul4	Al	0	1	0	22	72	6
1029	55	85	Ltu	(Sw)Bt	0	0	0	37.5	52.5	10
1029	85	120	Tl	(Sd)Bt	0	0	0	55	30	15
1030	0	5	Us	Ah	0	5	3	4	65	31
1030	5	15	Us	AhAl	10	4	3	4	65	31
1030	15	25	Us	Al	20	2.5	3	4	65	31
1030	25	80	Slu	SwAl	0	1	3	11.5	45	43.5
1030	80	110	Tl	SdBt	0	0.5	3	55	30	15
1031	0	8	Ul4	Ah	0	5	0	22	72	6
1031	8	45	Lt3	BvCv	37	3	0	40	40	20
1031	45	65	Lt3	Cv	60	1.5	0	40	40	20
1032	0	10	Lu	Ah	0	4	0	23.5	60	16.5
1032	10	25	Tl	AhBvCv	5	3	0	55	30	15
1032	25	75	Tl	BvCv	27	1.5	0	55	30	15
1032	75	110	Tl	Cv	50	1.5	0	55	30	15
1033	0	20	Lt3	Ah	40	3	0	40	40	20
1033	20	30	Lt3	PAh	70	2	0	40	40	20
1033	30	60	Lt2	P	70	0	0	30	42.5	27.5
1034	0	15	Sl4	Ah	0	3	2	13.5	26.5	60
1034	15	35	Ls3	Al	2	2	2	20.5	34.5	45
1034	35	60	Lts	Bt	0	1	2	35	24	41
1035	0	25	Lu	Ah	30	5	0	23.5	60	16.5
1035	25	60	Tu3	AhCv	50	1.5	0	40	50	10
1035	60	110	Tu3	Cv	60	0.5	0	40	50	10
1036	0	5	Lu	Ah oben	50	5	0	23.5	60	16.5
1036	5	15	Lu	Ah unten	50	5	0	23.5	60	16.5
1036	15	25	Tu3	AhCv	50	4	0	40	50	10
1036	25	45	Tu3	Cv I	50	1.5	0	40	50	10
1036	45	110	Tu3	Cv II	50	1	0	40	50	10
1037	0	20	Ut4	Ah	10	2	0	20	65	15
1037	20	30	Ut4	Bv	10	2	0	20	65	15
1037	30	70	Sl3	BvCv	20	3	0	10	23.5	66.5
1038	0	5	Lt2	Ah	10	4	0	30	42.5	27.5
1038	5	20	Tu2	BvAh	10	3	0	55	37.5	7.5
1038	20	40	Lts	Bv	10	2	0	35	24	41
1038	40	60	T	BvCv	50	1	0	82.5	8.8	8.8
1039	0	3	Sl2	Oh	5	6	0	6.5	15	78.5
1039	3	10	Ut4	Ah	5	2	0	20	65	15
1039	10	30	Ut4	Al	5	3	0	20	65	15
1039	30	60	Ut4	Bt	5	1	0	20	65	15
1039	60	80	Ls2	Cv	50	0	0	20	45	35
1040	0	3	Sl2	Oh	20	6	4	6.5	15	78.5
1040	3	20	Sl3	Ah	20	4	4	10	23.5	66.5
1040	20	40	Ls4	Al	20	2	4	21	21.5	57.5
1040	40	70	Ls4	Bt	20	2	4	21	21.5	57.5
1040	70	100	Ls4	CvBt	20	1	4	21	21.5	57.5
1041	0	15	Ut4	Ah	30	4	0	20	65	15
1041	15	35	Ut4	AhBv	60	4	0	20	65	15
1041	35	80	Uls	Bv	80	4	0	12.5	57.5	30
1041	80	120	Sl4	Cv	50	1	0	13.5	26.5	60
1042	0	5	Lu	Ah oben	30	6	0	23.5	60	16.5
1042	5	30	Ut3	Ah unten	75	5	0	13.5	68.5	18
1042	30	60	Uls	AhBv	90	5	0	12.5	57.5	30
1042	60	110	Ut4	Bv	80	3	0	20	65	15
1043	0	10	Ut4	Ah	60	5	0	20	65	15
1043	10	40	Slu	AhBv	80	3	0	11.5	45	43.5
1043	40	90	Slu	Bv	85	3	0	11.5	45	43.5
1043	90	120	Slu	Cv	85	0.5	0	11.5	45	43.5
1044	0	5	Ul3	Ah	0	5	3	14.5	75.5	10
1044	5	10	Ul3	AhAl	0	4	3	14.5	75.5	10
1044	10	25	Ul3	SwAl	0	3	3	14.5	75.5	10
1044	25	45	Ul3	AlSW	0	0.5	3	14.5	75.5	10
1044	45	100	Ul3	BtSd	0	0	3	14.5	75.5	10
1045	0	5	Ul3	Ah	10	5	0	14.5	75.5	10
1045	5	16	Lu	AhBvCv	10	4	0	23.5	60	16.5
1045	16	55	Lt3	BvCv	35	2	0	40	40	20
1045	55	95	Lt3	Cv	50	0	0	40	40	20
1046	0	2	Ls2	Ah	0	5	0	20	45	35
1046	2	10	Slu	Ahl	0	2.5	0	11.5	45	43.5
1046	10	25	Sl4	Al	0	2.5	0	13.5	26.5	60
1046	25	40	Ls3	Bt	0	2.5	0	20.5	34.5	45
1046	40	70	Ls3	Bt	0	2.5	0	20.5	34.5	45
1046	70	100	Sl4	BtCv	0	2.5	0	13.5	26.5	60
1046	100	110	St2	II IC	80	1	0	10	7.5	82.5
1047	0	2	Ls3	Of	0	5	0	20.5	34.5	45
1047	2	10	Ls3	Ah	1	4	0	20.5	34.5	45
1047	10	20	Ls3	AhAl	1	3	0	20.5	34.5	45
1047	20	40	Ls3	Al	1	2	0	20.5	34.5	45
1047	40	80	Ls4	Bt	1	1	0	21	21.5	57.5
1047	80	120	Lts	Bt	1	1	0	35	24	41
1047	120	130	Ls4	BtC	80	2	0	21	21.5	57.5
1047	130	150	S	D	0	0	0	2.5	5	92.5
1048	0	10	Tu2	Ah	1	3	0	55	37.5	7.5
1048	10	25	Tu2	AhBv	5	3	0	55	37.5	7.5
1048	25	70	Lt3	Bv	30	2	0	40	40	20
1048	70	100	Lt2	BvCv	60	1	0	30	42.5	27.5
1049	0	10	Ul4	Ah	10	5	0	22	72	6
1049	10	20	Lu	AhBv	10	4	0	23.5	60	16.5
1049	20	50	Lt3	BvCv I	60	3	0	40	40	20
1049	50	70	Lu	BvCv II	60	2	0	23.5	60	16.5
1049	70	95	Ul3	Cv	75	1	0	14.5	75.5	10
1050	0	10	Lu	Ah I	5	4	0	23.5	60	16.5
1050	10	25	Lu	Ah II	10	4	0	23.5	60	16.5
1050	25	35	Ltu	AhCv	40	3	0	37.5	52.5	10
1050	35	110	Ul2	Cv	0	2	0	10	76.5	13.5
1051	0	5	Uls	Ah	10	3	0	12.5	57.5	30
1051	5	15	Uls	Alh	10	3	0	12.5	57.5	30
1051	15	25	Lsu	Bev	10	2	0	20	45	35
1051	25	40	Lsu	Bev	10	2	0	20	45	35
1051	40	70	Ltu	Bt	10	0.5	0	37.5	52.5	10
1051	70	130	Ltu	SdBt	70	0	0	37.5	52.5	10
1052	0	10	Ls3	Ah	0	4	0	20.5	34.5	45
1052	10	40	Ls3	Al	0	3	0	20.5	34.5	45
1052	40	60	Lsu	Btv	0	1.5	0	20	45	35
1052	60	120	St2	BtCv	0	0	0	10	7.5	82.5
1053	0	3	Ul3	Oh	30	5	0	14.5	75.5	10
1053	3	15	Sl4	Ah	30	5	0	13.5	26.5	60
1053	15	25	Sl4	AhAl	30	5	0	13.5	26.5	60
1053	25	50	Sl3	Al	30	5	0	10	23.5	66.5
1053	50	110	Sl3	Bt	70	2	0	10	23.5	66.5
1054	0	4	Lts	L/Of/Oh	2	4	0	35	24	41
1054	4	12	Ls2	Ah	2	4	0	20	45	35
1054	12	35	Ls2	Bv	5	4	0	20	45	35
1054	35	50	Ls2	BvCv	10	2	0	20	45	35
1054	50	120	Ls3	Cv	30	0	0	20.5	34.5	45
1055	0	10	Tu2	Ah	0	3	3	55	37.5	7.5
1055	10	30	Tu2	AhAl	0	2	3	55	37.5	7.5
1055	30	50	Lt3	AlSw	2	2	3	40	40	20
1055	50	70	Lt3	SdBt	2	2	3	40	40	20
1056	0	5	Ls2	Ah	0	3	0	20	45	35
1056	5	15	Ls2	AhAl	0	3	0	20	45	35
1056	15	30	Ls2	Al1	0	2	0	20	45	35
1056	30	50	Ls3	Al2	0	2	0	20.5	34.5	45
1056	50	90	Ls2	Bt1	0	1	0	20	45	35
1057	0	3	Ls3	Oh	0	4	0	20.5	34.5	45
1057	3	6	Ut4	Ah	0	2	0	20	65	15
1057	6	15	Ls2	AhBv	0	2	0	20	45	35
1057	15	50	Ls2	Bv1	0	2	0	20	45	35
1057	50	90	Slu	Bv2	0	2	0	11.5	45	43.5
1060	0	15	Lu	Ah	0	4	0	23.5	60	16.5
1060	15	25	Tl	AhAl	10	2	0	55	30	15
1060	25	40	Tl	Al	10	2	0	55	30	15
1060	40	60	Tl	Bt	25	1	0	55	30	15
1060	60	90	Tl	BvCv	25	1	0	55	30	15
1061	0	5	St2	Ah	0	4	1	10	7.5	82.5
1061	5	15	St2	AhAl	0	4	1	10	7.5	82.5
1061	15	40	St2	Al	2	2	1	10	7.5	82.5
1061	40	110	St3	Bt	5	1	1	20	7.5	72.5
1062	0	4	Ut4	L/Of/Oh	0	5	1	20	65	15
1062	4	10	Ut4	Ah	0	2	1	20	65	15
1062	10	50	Ut3	Al	0	1	1	13.5	68.5	18
1062	50	100	Lt3	Sw	0	0	1	40	40	20
1063	0	10	Lu	Ah	20	4	0	23.5	60	16.5
1063	10	20	Lu	AhAl	10	3	0	23.5	60	16.5
1063	20	40	Lu	Al	10	3	0	23.5	60	16.5
1063	40	60	Ls2	Bt	30	2	0	20	45	35
1063	60	70	Ls2	BtCv	30	2	0	20	45	35
1063	70	100	Ls2	Cv	70	1	0	20	45	35
1064	0	5	Us	Oh	0	5	0	4	65	31
1064	5	10	Lu	AhAl	10	2	0	23.5	60	16.5
1064	10	25	Lu	Al	10	2	0	23.5	60	16.5
1064	25	40	Ltu	Bt	50	1	0	37.5	52.5	10
1064	40	60	Ls2	BtCv	80	2	0	20	45	35
1064	60	120	Slu	Cv	80	0	0	11.5	45	43.5
1065	0	5	Ut3	Ah	10	4	3	13.5	68.5	18
1065	5	15	Ut3	AhAl	10	4	3	13.5	68.5	18
1065	15	60	Lt3	AlSw	5	2	3	40	40	20
1065	60	70	Tl	SdBt	10	0	3	55	30	15
1065	70	120	Tl	Cv	10	0	3	55	30	15
1066	0	5	Tl	Ah	0	3	0	55	30	15
1066	5	15	Tl	AhAl	0	3	0	55	30	15
1066	15	30	Tl	Al	0	2	0	55	30	15
1066	30	80	Tl	Bt	0	0	0	55	30	15
1066	80	115	Lts	BtCv	0	0	0	35	24	41
1067	0	15	Tu4	Ah	0	4	0	30	60	10
1067	15	25	Lt3	AhAl	5	2	0	40	40	20
1067	25	30	Lt3	Al	5	2	0	40	40	20
1067	30	70	Tl	Bt	10	2	0	55	30	15
1068	0	15	Tl	Ah/AhAl	0	3	3	55	30	15
1068	15	25	Tl	Al	0	2	3	55	30	15
1068	25	50	Tl	Bt	0	1	3	55	30	15
1068	50	120	Tu2	Gor	0	0	3	55	37.5	7.5
1069	0	5	Ul3	Ah	10	3	0	14.5	75.5	10
1069	5	15	Ul3	AhAl	10	3	0	14.5	75.5	10
1069	15	30	Ul2	Al	10	3	0	10	76.5	13.5
1069	30	60	Ut4	Bt	20	1	0	20	65	15
1070	0	10	Lu	Ah	0	3	0	23.5	60	16.5
1070	10	30	Tl	AhAl	10	1	0	55	30	15
1070	30	50	Tl	Al	10	1	0	55	30	15
1070	50	100	Ut4	SdBt	20	0	0	20	65	15
1071	0	15	Lt3	Ah	0	3	0	40	40	20
1071	15	25	Lt3	AhAl	0	3	0	40	40	20
1071	25	30	Lt3	Al	0	3	0	40	40	20
1071	30	60	Tl	Bt	0	3	0	55	30	15
1072	0	5	Us	Ah	20	4	0	4	65	31
1072	5	20	Ul3	AhAl	20	3	0	14.5	75.5	10
1072	20	30	Ul3	Al	20	3	0	14.5	75.5	10
1072	30	70	Ul3	Bt	50	2	0	14.5	75.5	10
1072	70	110	Ul3	Bv	50	2	0	14.5	75.5	10
1073	0	5	Lu	Ahoben	0	4	3	23.5	60	16.5
1073	5	15	Lu	Ahunten	0	4	3	23.5	60	16.5
1073	15	20	Lu	Al	0	4	3	23.5	60	16.5
1073	20	30	Tl	Bt	15	2	3	55	30	15
1073	30	40	Tl	SdBt	15	2	3	55	30	15
1073	40	70	Lu	BtCv	40	2	3	23.5	60	16.5
1074	0	10	Uls	Ah	20	3	0	12.5	57.5	30
1074	10	50	Ul4	Al	20	3	0	22	72	6
1074	50	80	Lt2	Bt	30	2	0	30	42.5	27.5
1074	80	110	Ul4	BvCv	50	2	0	22	72	6
1075	0	5	Us	Oh	10	4	0	4	65	31
1075	5	10	Ts3	Ah	10	3	0	42.5	9	48.5
1075	10	30	Lts	Al	25	1	0	35	24	41
1075	30	80	Lts	Bt	20	1	0	35	24	41
1075	80	110	Ls3	BtCv	70	1	0	20.5	34.5	45
1076	0	7	Us	Ah oben	5	5	0	4	65	31
1076	7	15	Lsu	Ah unten	5	4	0	20	45	35
1076	15	35	Ts2	Al	10	3	0	57.5	9	33.5
1076	35	70	Ts2	Bt	10	3	0	57.5	9	33.5
1076	70	90	Ts2	fAh	10	1	0	57.5	9	33.5
1077	0	15	Lu	Ah	0	4	1	23.5	60	16.5
1077	15	40	Lu	AhAl	0	4	1	23.5	60	16.5
1077	40	60	Tl	Bt	0	2	1	55	30	15
1077	60	70	Tl	fAh	0	2	1	55	30	15
1077	70	80	Tl	fBv	5	1	1	55	30	15
1078	0	5	Su3	Ah	40	5	0	10	23.5	66.5
1078	5	30	Sl3	AhAl/Al	50	3.5	0	10	23.5	66.5
1078	30	60	Ls2	CvBt	70	1.5	0	20	45	35
1079	0	1	Lts	Oh	0	5	4	35	24	41
1079	1	20	Ls3	Ah	5	3	4	20.5	34.5	45
1079	20	30	Ls3	Al	5	1.5	4	20.5	34.5	45
1079	30	60	Lt3	SdBt	5	1	4	40	40	20
1079	60	90	Lt3	BtCv	10	1	4	40	40	20
1079	90	120	Lt2	Cv	60	0	4	30	42.5	27.5
1080	0	10	Ls2	Ah	20	1	0	20	45	35
1080	10	20	Ls2	AhAl	20	1	0	20	45	35
1080	20	50	Ls2	Al	30	1	0	20	45	35
1080	50	80	Ls2	Bv	30	4	0	20	45	35
1080	80	130	Ls3	Bt	90	3	0	20.5	34.5	45
1080	130	140	Sl3	Cv	70	2	0	10	23.5	66.5
1081	0	5	Ul3	Oh	5	5	0	14.5	75.5	10
1081	5	10	Ul3	Ah	5	5	0	14.5	75.5	10
1081	10	32	Lu	BvAl	10	4	0	23.5	60	16.5
1081	32	70	Lt3	BvBt	5	1	0	40	40	20
1081	70	90	Lu	Cv	5	0	0	23.5	60	16.5
1082	0	5	Lu	Oh	0	4	4	23.5	60	16.5
1082	5	10	Lu	Ah	0	4	4	23.5	60	16.5
1082	10	30	Ltu	Bv	5	2.5	4	37.5	52.5	10
1082	30	50	Lt3	GoBv	5	1	4	40	40	20
1082	50	80	Lt3	GoCv	10	0	4	40	40	20
1082	80	90	nan	?	nan	nan	nan	nan	nan	nan
1083	0	5	Lsu	Oh	5	4	0	20	45	35
1083	5	15	Lsu	Ah	5	4	0	20	45	35
1083	15	45	Ls3	Al	5	1	0	20.5	34.5	45
1083	45	60	Lt3	Bt	5	1	0	40	40	20
1083	60	100	Lt3	BtCv	5	1	0	40	40	20
1084	0	5	Lt2	Ah	0	4	1	30	42.5	27.5
1084	5	15	Ls2	AhAl	1	1	1	20	45	35
1084	15	55	Ls3	Al	1	1	1	20.5	34.5	45
1084	55	130	Lt2	SdBt	1	0	1	30	42.5	27.5
1084	130	150	Sl3	Cv	0	0	1	10	23.5	66.5
1085	0	10	Sl2	Ah	2	5	0	6.5	15	78.5
1085	10	20	Sl3	AhBv	5	4	0	10	23.5	66.5
1085	20	50	Sl3	Bv/1	5	3	0	10	23.5	66.5
1085	50	80	Lsu	Bv/2	5	3	0	20	45	35
1085	80	100	Sl4	Cv	60	0	0	13.5	26.5	60
1086	0	15	Ul3	Ah	0	3	0	14.5	75.5	10
1086	15	30	Ul3	AhAl	5	3	0	14.5	75.5	10
1086	30	50	Ul3	Al	10	3	0	14.5	75.5	10
1086	50	100	Lt3	Bt	20	2	0	40	40	20
1086	100	120	Lu	BvCv	20	1	0	23.5	60	16.5
1086	120	140	Ls2	Cv	20	nan	0	20	45	35
1087	0	5	Lts	Oh	5	5	0	35	24	41
1087	5	20	Ls3	Ah	5	4	0	20.5	34.5	45
1087	20	50	Ls3	Bv	10	3	0	20.5	34.5	45
1087	50	110	Lts	BvCv	10	1	0	35	24	41
1088	0	5	Lts	Oh	0	4	0	35	24	41
1088	5	10	Lts	Ah	10	3	0	35	24	41
1088	10	40	Lts	Al	10	3	0	35	24	41
1088	40	60	Lts	Bt	10	0	0	35	24	41
1088	60	100	Lts	BvCv	10	0	0	35	24	41
1090	0	10	Ls2	Ah	0	5	0	20	45	35
1090	10	25	Ut4	AhAl	0	3	0	20	65	15
1090	25	55	Ut4	Al	0	2	0	20	65	15
1090	55	100	Ls2	Bt	0	1	0	20	45	35
1091	0	5	Ls3	L/Of/Oh	0	5	1	20.5	34.5	45
1091	5	10	Ut4	Ah	0	3	1	20	65	15
1091	10	50	Uls	Al	0	2	1	12.5	57.5	30
1091	50	100	Ut4	Bt	0	0	1	20	65	15
1092	0	10	Lu	Ah	50	5	0	23.5	60	16.5
1092	10	30	Lu	(Bv)Ah	70	4	0	23.5	60	16.5
1092	30	60	Lu	BvAh	70	2	0	23.5	60	16.5
1093	0	15	Lsu	Ah	10	5	0	20	45	35
1093	15	30	Lt2	BvAh	40	4	0	30	42.5	27.5
1093	30	60	Lt2	Bv	50	1.5	0	30	42.5	27.5
1094	0	15	Lsu	Ah	2	5	0	20	45	35
1094	15	30	Ls3	BvAh	5	4	0	20.5	34.5	45
1094	30	45	Lts	BvCv	40	3	0	35	24	41
1094	45	60	Ls4	Cv	50	3	0	21	21.5	57.5
1095	0	10	Lsu	Ah	30	5	0	20	45	35
1095	10	20	Lu	BvAh	70	4	0	23.5	60	16.5
1095	20	30	Lsu	BvCv	70	3	0	20	45	35
1095	30	55	Lsu	Bt	70	3	0	20	45	35
1096	0	5	Lt2	Ah	10	5	0	30	42.5	27.5
1096	5	15	Lt2	Ah	10	5	0	30	42.5	27.5
1096	15	30	Lt3	BvAh	50	4	0	40	40	20
1097	0	5	Lt2	Ah	0	4	0	30	42.5	27.5
1097	5	20	Ls2	BvAh	0	4	0	20	45	35
1097	20	40	Sl4	Bv	0	4	0	13.5	26.5	60
1097	40	60	Sl4	Bv	0	1	0	13.5	26.5	60
1097	60	100	Sl3	Bv	0	0	0	10	23.5	66.5
1098	0	10	Sl4	Ah	0	4	0	13.5	26.5	60
1098	10	20	Sl4	AhAl	0	2	0	13.5	26.5	60
1098	20	40	Sl4	Al	0	1	0	13.5	26.5	60
1098	40	90	St3	Bt	0	1	0	20	7.5	72.5
1098	90	110	Sl4	GoCv	0	0.5	0	13.5	26.5	60
1099	0	12	Ls3	Of/Oh	0	4	4	20.5	34.5	45
1099	12	18	Ls3	Ahe	0	2	4	20.5	34.5	45
1099	18	30	Lts	Bs	0	1	4	35	24	41
1099	30	50	Lts	BvGo	0	1	4	35	24	41
1099	50	80	Lts	CvGo	15	0	4	35	24	41
1100	0	10	Lsu	L/Of/Oh	0	4	3	20	45	35
1100	10	20	Lsu	Aeh	0	2	3	20	45	35
1100	20	40	Lts	Bvs	0	1.5	3	35	24	41
1100	40	60	Lts	BvGo	0	0	3	35	24	41
1100	60	120	Lts	GoGr	5	0	3	35	24	41
1101	0	10	Lsu	Ah	5	6	0	20	45	35
1101	10	20	Lsu	BvAh	50	5	0	20	45	35
1101	20	40	Lt2	BvCv	70	4	0	30	42.5	27.5
1101	40	80	Lt2	Cv	100	0	0	30	42.5	27.5
1102	0	20	Ul3	Oh	10	6	0	14.5	75.5	10
1102	20	40	Lsu	AhBv	90	3	0	20	45	35
1102	40	60	Lt3	CvAh	90	3	0	40	40	20
1102	60	80	Lt3	BvCv	90	2	0	40	40	20
1103	0	5	Ut3	Oh	0	6	0	13.5	68.5	18
1103	5	10	Sl3	Ah	0	6	0	10	23.5	66.5
1103	10	20	Sl4	Ahl	40	3	0	13.5	26.5	60
1103	20	40	Sl4	Al	40	2	0	13.5	26.5	60
1103	40	80	Lt3	Bvt	50	2	0	40	40	20
1104	-5	0	Lsu	Oh	5	4	2	20	45	35
1104	0	20	Lsu	Ah	5	4	2	20	45	35
1104	20	40	Tu2	BvP	5	2	2	55	37.5	7.5
1104	40	80	Tu2	BvP	5	2	2	55	37.5	7.5
1104	80	100	Ls3	GoCv	70	1	2	20.5	34.5	45
1105	-5	0	Lt3	Oh	0	6	0	40	40	20
1105	0	5	Ls3	Ah	2	6	0	20.5	34.5	45
1105	5	10	Ls3	Ahe	2	6	0	20.5	34.5	45
1105	10	15	Ls3	AeBv	30	3	0	20.5	34.5	45
1105	15	30	Sl4	Bsv	30	2	0	13.5	26.5	60
1105	30	45	Su2	Bv	30	2	0	2.5	17.5	80
1105	45	60	S	Cv	90	0	0	2.5	5	92.5
1106	0	5	Ltu	Oh/Ah oben	10	3	0	37.5	52.5	10
1106	5	15	Ltu	Ah	10	3	0	37.5	52.5	10
1106	15	30	Ltu	Bv	10	3	0	37.5	52.5	10
1106	30	50	Ltu	Bv	10	2	0	37.5	52.5	10
1106	50	70	Ltu	IICv	50	2	0	37.5	52.5	10
1107	0	5	Ls3	Oh	0	5	1	20.5	34.5	45
1107	5	10	Ls3	Ah	10	2	1	20.5	34.5	45
1107	10	18	Ls3	Aeh/BsvAh	10	2	1	20.5	34.5	45
1107	18	30	Ls3	Bv	10	2	1	20.5	34.5	45
1107	30	60	Slu	BvCv	10	0.5	1	11.5	45	43.5
1108	0	10	Lu	Ah	65	5.5	0	23.5	60	16.5
1108	10	30	Lu	AhBv	65	5	0	23.5	60	16.5
1108	30	60	Lt3	Bv	90	3	0	40	40	20
1109	0	10	Lu	Ah	60	6	0	23.5	60	16.5
1109	10	35	Ls3	BvAh	80	4	0	20.5	34.5	45
1109	35	60	Lsu	BvCv	80	2	0	20	45	35
1110	0	5	St2	Oh	0	3	2	10	7.5	82.5
1110	5	15	St2	Ah	0	3	2	10	7.5	82.5
1110	15	40	St2	Bv	0	2	2	10	7.5	82.5
1110	40	70	St2	SwBv	0	2	2	10	7.5	82.5
1110	70	110	St2	Sw	0	1	2	10	7.5	82.5
1110	110	200	St2	Cv	nan	nan	2	10	7.5	82.5
1111	0	10	Lt2	Ah	0	2	0	30	42.5	27.5
1111	10	20	Lt2	AhAl	0	2	0	30	42.5	27.5
1111	20	40	Lts	Al	0	1	0	35	24	41
1111	40	70	Lts	Bt	2	1	0	35	24	41
1111	70	80	Ls2	BtCv	5	1	0	20	45	35
1111	80	110	Ls2	Cv	5	1	0	20	45	35
1112	0	3	Lu	Oh	0	3	3	23.5	60	16.5
1112	3	10	Ut4	Ah	0	3	3	20	65	15
1112	10	30	Ut4	Al	0	2	3	20	65	15
1112	30	50	Lu	Bt	0	1	3	23.5	60	16.5
1112	50	70	Lt3	BtGo	0	1	3	40	40	20
1112	70	100	Lt3	Gr	0	0	3	40	40	20
1113	0	5	Ls2	Oh	1	3	3	20	45	35
1113	5	15	Ls2	Ah	1	2	3	20	45	35
1113	15	30	Ls2	AhAl	1	1	3	20	45	35
1113	30	50	Ls2	Al	2	1	3	20	45	35
1113	50	70	Lt2	Bt	5	1	3	30	42.5	27.5
1113	70	90	Lt2	SdBt	5	1	3	30	42.5	27.5
1113	90	120	Ls2	BtCv	25	0.5	3	20	45	35
1114	0	20	Ul2	Ah	0	3	2	10	76.5	13.5
1114	20	40	Lu	Al	2	3	2	23.5	60	16.5
1114	40	70	Lt3	Go	2	1	2	40	40	20
1114	70	90	Tu2	GrCv	0	1	2	55	37.5	7.5
1114	90	120	Ltu	Cv	0	0	2	37.5	52.5	10
1115	0	1	Ut3	Oh	0	5	4	13.5	68.5	18
1115	1	20	Tu2	AhAl	0	3	4	55	37.5	7.5
1115	20	40	Lt3	GoBt	0	1	4	40	40	20
1115	40	70	Ltu	GrBt	0	1	4	37.5	52.5	10
1115	70	100	Lt2	GrCv	0	1	4	30	42.5	27.5
1115	100	130	Lt2	Cv	0	1	4	30	42.5	27.5
1116	0	10	Lt3	Ah	0	4	3	40	40	20
1116	10	20	Lt3	AhAl	0	3	3	40	40	20
1116	20	40	Lt3	Al	1	2	3	40	40	20
1116	40	70	Lt3	Bt	1	2	3	40	40	20
1116	70	80	Lt3	BtCv	0	2	3	40	40	20
1116	80	100	Lt2	Cv	0	0	3	30	42.5	27.5
1117	0	8	Lt3	Of/Oh	0	4	2	40	40	20
1117	8	15	Lu	Ah	0	2	2	23.5	60	16.5
1117	15	40	Lu	Al	0	1	2	23.5	60	16.5
1117	40	60	Lu	Bt	0	1	2	23.5	60	16.5
1117	60	120	Ltu	SdBt	0	0	2	37.5	52.5	10
1117	120	170	Ltu	SdBt	0	0	2	37.5	52.5	10
1117	170	190	Ut4	Cv	0	0	2	20	65	15
1118	0	10	Lt3	Of/Oh	0	4	3	40	40	20
1118	10	16	Lu	Ah	0	3	3	23.5	60	16.5
1118	16	40	Lt2	Al	0	1	3	30	42.5	27.5
1118	40	50	Lt2	Bt	0	1	3	30	42.5	27.5
1118	50	90	Lu	SdBt	0	0	3	23.5	60	16.5
1118	90	120	Su3	GrCv	0	0	3	10	23.5	66.5
1118	120	170	Ls2	nan	0	0	3	20	45	35
1118	170	190	Ls3	nan	0	0	3	20.5	34.5	45
1118	190	220	Uls	nan	0	0	3	12.5	57.5	30
1120	0	5	Sl2	Oh	10	5	0	6.5	15	78.5
1120	5	10	Sl2	Ah	10	5	0	6.5	15	78.5
1120	10	35	Sl3	Bhv	10	3	0	10	23.5	66.5
1120	35	55	Sl3	Bh	10	3	0	10	23.5	66.5
1120	55	70	Su2	Cv	70	0	0	2.5	17.5	80
1120	70	100	Su2	Cv	70	0	0	2.5	17.5	80
1121	0	5	Lt2	Ah	5	4	0	30	42.5	27.5
1121	5	10	Lt2	Ah	5	4	0	30	42.5	27.5
1121	10	25	Lt3	BvAh	5	4	0	40	40	20
1121	25	50	Lt3	BvAh	70	4	0	40	40	20
1121	50	70	Tu2	AhBv	70	2.5	0	55	37.5	7.5
1121	70	80	Tu2	Cv	nan	2.5	0	55	37.5	7.5
1122	0	2	Lts	L/Of/Oh	0	5	0	35	24	41
1122	2	10	Ls3	Ah	0	5	0	20.5	34.5	45
1122	10	40	Ls2	Bv	20	3	0	20	45	35
1122	40	70	Ls3	Cv	100	1	0	20.5	34.5	45
1123	0	10	Uls	L/Of/Oh	0	6	0	12.5	57.5	30
1123	10	17	Uls	Bhv	40	4	0	12.5	57.5	30
1123	17	60	Slu	Bv	10	4	0	11.5	45	43.5
1123	60	90	Su2	Cv	30	0	0	2.5	17.5	80
1124	0	10	Lts	Ah	0	5	0	35	24	41
1124	10	15	Lt2	Bh	30	4	0	30	42.5	27.5
1124	15	40	Ls3	Bh	30	4	0	20.5	34.5	45
1124	40	75	Su3	Bh	60	3	0	10	23.5	66.5
1125	0	10	Ls4	Ah	0	4	0	21	21.5	57.5
1125	10	40	Sl4	Bh	10	3	0	13.5	26.5	60
1125	40	60	Sl3	Bh	60	3	0	10	23.5	66.5
1125	60	70	Su2	Bs	80	1	0	2.5	17.5	80
1125	70	110	Su2	Cv	90	1	0	2.5	17.5	80
1126	0	10	Lts	Ah	0	3	0	35	24	41
1126	10	30	Sl4	Bh	0	3	0	13.5	26.5	60
1126	30	50	Sl3	Bh	5	3	0	10	23.5	66.5
1126	50	65	Su2	Bv	30	1	0	2.5	17.5	80
1126	65	90	Su2	Cv	90	0	0	2.5	17.5	80
1127	0	10	Lts	Ah	0	4	0	35	24	41
1127	10	40	Sl4	Bh	5	3	0	13.5	26.5	60
1127	40	65	Su3	Bv	30	3	0	10	23.5	66.5
1128	0	1	Su3	Oh	0	6	0	10	23.5	66.5
1128	1	2	Su3	Ahe	30	4	0	10	23.5	66.5
1128	2	20	Ls2	BvAh	50	4	0	20	45	35
1128	20	60	Sl3	BvCv	70	1.5	0	10	23.5	66.5
1128	60	100	Su3	Cv II	70	1	0	10	23.5	66.5
1129	0	3	Su3	Of	0	5.5	0	10	23.5	66.5
1129	3	5	Su3	Aeh	0	4	0	10	23.5	66.5
1129	5	20	Sl2	Bv	10	4	0	6.5	15	78.5
1129	20	50	Sl2	Bhv	30	4	0	6.5	15	78.5
1129	50	80	Slu	Bsv	40	3	0	11.5	45	43.5
1129	80	100	Slu	Cv	60	1	0	11.5	45	43.5
1130	0	5	Ls2	Of	3	5	1	20	45	35
1130	5	10	Ls2	Oh	3	5	1	20	45	35
1130	10	20	Ls2	Aeh	5	4	1	20	45	35
1130	20	40	Ls2	Bhv	10	3	1	20	45	35
1130	40	70	Lts	Bsv	25	2	1	35	24	41
1130	70	90	Lts	BvCv	25	1	1	35	24	41
1130	90	120	Ls3	GoCv	60	1	1	20.5	34.5	45
1131	0	7	Ul4	Of	5	5	0	22	72	6
1131	7	18	Ul4	Oh	5	5	0	22	72	6
1131	18	20	Su2	Ahe/Aeh	5	1.5	0	2.5	17.5	80
1131	20	40	Su2	Bh	30	1	0	2.5	17.5	80
1131	40	50	Su2	Bs	30	1	0	2.5	17.5	80
1131	50	90	Sl4	Bsbh	40	1	0	13.5	26.5	60
1132	0	5	Lts	Oh	0	5	0	35	24	41
1132	5	15	Ls3	Ah	20	3	0	20.5	34.5	45
1132	15	25	Ls4	Bv	50	2	0	21	21.5	57.5
1132	25	100	Sl4	Bv	50	2	0	13.5	26.5	60
1133	0	15	Lts	Oh	10	4	0	35	24	41
1133	15	16	Ls4	Ahe	10	4	0	21	21.5	57.5
1133	16	20	Sl4	AeBs	30	2	0	13.5	26.5	60
1133	20	30	Sl4	Bs	30	2	0	13.5	26.5	60
1133	30	70	Su3	Bv	70	1	0	10	23.5	66.5
1134	0	4	Lts	Oh	0	6	0	35	24	41
1134	4	15	Ls3	Ah	25	5	0	20.5	34.5	45
1134	15	40	Ls3	Bv	40	3	0	20.5	34.5	45
1134	40	100	Su3	Cv	75	1	0	10	23.5	66.5
1135	0	10	Lts	Oh	5	5	0	35	24	41
1135	10	70	Sl3	Cv I	80	3	0	10	23.5	66.5
1136	0	3	Lts	Oh	0	3	0	35	24	41
1136	3	4	Lts	Aeh	0	3	0	35	24	41
1136	4	25	Sl4	AhBv	70	3	0	13.5	26.5	60
1136	25	45	Su3	Bv	70	3	0	10	23.5	66.5
1136	45	80	Su3	Cv	90	2	0	10	23.5	66.5
1137	0	30	Lu	Ah	60	4	0	23.5	60	16.5
1137	30	70	Ls2	AhBv	60	3	0	20	45	35
1138	-2	0	Ls3	Oh	0	5	3	20.5	34.5	45
1138	0	5	Ls3	Ah	0	5	3	20.5	34.5	45
1138	5	25	Ls3	Al	0	2	3	20.5	34.5	45
1138	25	50	Ls3	Bt	0	2	3	20.5	34.5	45
1138	50	70	Sl4	GoGr	0	1	3	13.5	26.5	60
1139	0	5	Tu2	Ah	5	4	0	55	37.5	7.5
1139	5	15	Ltu	AhAl	5	2	0	37.5	52.5	10
1139	15	30	Lu	Al	50	2	0	23.5	60	16.5
1139	30	80	Tl	Bt	40	1	0	55	30	15
1140	0	5	Lt3	Oh	0	5	0	40	40	20
1140	5	15	Ltu	Ah	80	3	0	37.5	52.5	10
1140	15	30	Ltu	Al	80	3	0	37.5	52.5	10
1140	30	60	Ltu	Bt	80	0	0	37.5	52.5	10
1141	0	5	Ul4	Oh	0	4	2	22	72	6
1141	5	10	Ul4	Ah	0	4	2	22	72	6
1141	10	40	Ul4	Al	0	3	2	22	72	6
1141	40	60	Ul4	Bt	0	2	2	22	72	6
1141	60	130	Ul4	SdBt	0	0	2	22	72	6
1142	0	5	Ltu	Ah oben	30	5	0	37.5	52.5	10
1142	5	20	Ltu	Ah unten	50	5	0	37.5	52.5	10
1142	20	40	Ls2	AhBv	80	4	0	20	45	35
1143	0	5	Ls2	Oh	0	4	0	20	45	35
1143	5	20	Slu	Ah	5	3	0	11.5	45	43.5
1143	20	50	Slu	Al	30	3	0	11.5	45	43.5
1143	50	65	Sl3	Bt	30	2	0	10	23.5	66.5
1143	65	75	Sl2	Bv	70	2	0	6.5	15	78.5
1143	75	90	Sl3	BvCv	30	2	0	10	23.5	66.5
1143	90	120	Sl3	Cv	40	2	0	10	23.5	66.5
1144	0	5	Ltu	Ah oben	0	3	0	37.5	52.5	10
1144	5	20	Ltu	Ah unten	0	3	0	37.5	52.5	10
1144	20	30	Ltu	AhBv	20	3	0	37.5	52.5	10
1144	30	50	Ltu	Bv	85	2	0	37.5	52.5	10
1144	50	100	Ut4	BvCv	75	2	0	20	65	15
1145	0	15	Tu2	Ah	30	3	0	55	37.5	7.5
1145	15	35	Tu2	AhBv	60	3	0	55	37.5	7.5
1145	35	70	Tl	Bv	80	1	0	55	30	15
1145	70	80	Tl	C	95	nan	0	55	30	15
1155	0	10	Lu	Ah	5	3	nan	23.5	60	16.5
1155	10	25	Lt3	AhAl	5	2	nan	40	40	20
1155	25	35	Lt3	Al	5	1.5	nan	40	40	20
1155	35	70	Tu3	SdBt	5	1	nan	40	50	10
1155	70	140	Lt3	Cv	60	1	nan	40	40	20
1156	0	3	Ut4	Aho	0	3	3	20	65	15
1156	3	10	Ut4	Ahu	0	3	3	20	65	15
1156	10	40	Ut4	Bv	1	1	3	20	65	15
1156	40	65	Lt2	SdBv	1	1	3	30	42.5	27.5
1156	65	110	Tu2	SdCv	1	1	3	55	37.5	7.5
1156	110	140	T	Cn	0	0	3	82.5	8.8	8.8
1157	0	5	Ul4	Ah oben	0	3	1	22	72	6
1157	5	15	Ut3	Ah unten	0	3	1	13.5	68.5	18
1157	15	50	Ul4	Al	0	2	1	22	72	6
1157	50	70	Ul4	BtBv	0	1	1	22	72	6
1157	70	140	Ul4	Bt	0	0.5	1	22	72	6
1157	140	150	Ul4	BvCv	0	0	1	22	72	6
1157	150	170	Ul2	Cv	0	0	1	10	76.5	13.5
1158	0	8	Lu	Ah oben	0	3	0	23.5	60	16.5
1158	8	15	Lu	Ah unten	0	3	0	23.5	60	16.5
1158	15	35	Lt2	AhBv	0	2	0	30	42.5	27.5
1158	35	55	Lt2	Bv	2	1	0	30	42.5	27.5
1158	55	80	Lt2	Cv1	50	0.5	0	30	42.5	27.5
1158	80	110	Lt2	Bv2	20	1	0	30	42.5	27.5
1158	110	150	Lt2	BvCv2	10	nan	0	30	42.5	27.5
1158	140	170	Ls2	Cv2	10	nan	0	20	45	35
1159	0	3	Ls3	Ah	0	5	0	20.5	34.5	45
1159	3	12	Ls2	AhAl	0	2	0	20	45	35
1159	12	40	Ls2	Al	0	1	0	20	45	35
1159	40	70	Lt3	Bt	0	1	0	40	40	20
1159	70	85	Tu2	BtCv	0	2	0	55	37.5	7.5
1159	85	100	Su3	Cv	0	2	0	10	23.5	66.5
1159	100	120	Su3	C	0	0	0	10	23.5	66.5
1160	0	10	Lt2	Ah	1	3	5	30	42.5	27.5
1160	10	20	Lt2	AhGo	1	2	5	30	42.5	27.5
1160	20	30	Lt2	Gor	1	1	5	30	42.5	27.5
1160	30	70	Lt3	Gr	1	1	5	40	40	20
1160	70	100	Ls3	Cv	1	1	5	20.5	34.5	45
1160	100	120	Slu	C	1	0.5	5	11.5	45	43.5
1161	0	5	Ls3	Ah oben	0	3	1	20.5	34.5	45
1161	5	20	Ls3	Ah unten	0	3	1	20.5	34.5	45
1161	20	40	Ls3	Al	0	2	1	20.5	34.5	45
1161	40	70	Ls3	Bt	0	2	1	20.5	34.5	45
1161	70	110	Ls2	SwC	0	0	1	20	45	35
1161	110	160	Sl3	C	0	0	1	10	23.5	66.5
1162	0	2	Ls3	Ah oben	0	4	0	20.5	34.5	45
1162	2	20	Sl4	Ah unten	50	4	0	13.5	26.5	60
1162	20	30	Sl4	Al	50	3	0	13.5	26.5	60
1162	30	120	Ls4	Bt	50	1	0	21	21.5	57.5
1162	120	130	Sl3	Cv	70	0	0	10	23.5	66.5
1163	0	3	Ut4	Oh	1	5	1	20	65	15
1163	3	10	Uls	Ah	1	4	1	12.5	57.5	30
1163	10	30	Uls	Al	1	4	1	12.5	57.5	30
1163	30	70	Ut4	Bt	2	0	1	20	65	15
1163	70	110	Lts	SdBt	20	0	1	35	24	41
1164	0	6	Ut4	Ah	0	5	2	20	65	15
1164	6	15	Ut4	AhAl	0	4	2	20	65	15
1164	15	40	Ut4	Al	1	3	2	20	65	15
1164	40	60	Ut4	AlSw	1	1	2	20	65	15
1164	60	125	Ut4	SdBt	1	0	2	20	65	15
1165	0	8	Lt2	Ah	0	5	4	30	42.5	27.5
1165	8	20	Ut4	AhAl	0	3	4	20	65	15
1165	20	30	Ut4	Al	0	2	4	20	65	15
1165	30	50	Lt2	SdBt	1	0	4	30	42.5	27.5
1165	50	95	Lt2	SdBt	1	0	4	30	42.5	27.5
1165	95	110	Sl4	Cv	0	0	4	13.5	26.5	60
1166	0	5	Lts	Ah oben	10	5	0	35	24	41
1166	5	25	Lts	Ah unten	10	5	0	35	24	41
1166	25	50	Ls3	AhBv	90	3	0	20.5	34.5	45
1166	50	70	Su2	Bv1	70	0.5	0	2.5	17.5	80
1166	70	110	Su2	Bv2	70	0	0	2.5	17.5	80
1167	0	5	St3	Ah	0	4	3	20	7.5	72.5
1167	5	15	Lts	AhAl	5	4	3	35	24	41
1167	15	30	Lt2	Al	5	3	3	30	42.5	27.5
1167	30	50	Lt2	Bt	5	0	3	30	42.5	27.5
1167	50	80	Lt2	BtCv	70	0	3	30	42.5	27.5
1167	80	100	Lt2	Cv	50	0	3	30	42.5	27.5
1168	0	15	Ut4	Ah	0	4	4	20	65	15
1168	15	30	Ut4	Al	0	2	4	20	65	15
1168	30	65	Lt2	SwAl	0	1	4	30	42.5	27.5
1168	65	110	Lu	Bt	0	0	4	23.5	60	16.5
1169	0	10	Ls3	Ah	0	4	4	20.5	34.5	45
1169	10	20	Ls3	Al	0	4	4	20.5	34.5	45
1169	20	30	Ls3	SwAl	0	3	4	20.5	34.5	45
1169	30	80	Ls3	SdBt	0	2	4	20.5	34.5	45
1169	80	110	Sl3	BvCv	0	1	4	10	23.5	66.5
1169	110	120	Su2	Cv	0	0	4	2.5	17.5	80
1170	0	10	Sl4	Ah	1	4	4	13.5	26.5	60
1170	10	20	Sl4	AhAl	1	3	4	13.5	26.5	60
1170	20	30	Sl4	Al	1	2	4	13.5	26.5	60
1170	30	40	Sl4	SwAl	5	2	4	13.5	26.5	60
1170	40	110	Ls3	SdBt	20	0	4	20.5	34.5	45
1171	0	10	Sl4	Ah	25	5	0	13.5	26.5	60
1171	10	30	Sl4	Al	25	5	0	13.5	26.5	60
1171	30	60	Sl4	Bt	40	4	0	13.5	26.5	60
1171	60	90	St2	BvCv	70	3	0	10	7.5	82.5
1171	90	120	S	Cv	80	1	0	2.5	5	92.5
1172	0	10	Ls3	Ah	0	5	0	20.5	34.5	45
1172	10	20	Ls2	AhAl	0	4	0	20	45	35
1172	20	70	Ls3	Al	0	3	0	20.5	34.5	45
1172	70	90	Ls3	Bt	0	1	0	20.5	34.5	45
1172	90	110	Sl4	Bv	50	1	0	13.5	26.5	60
1172	110	130	Sl3	Cv	50	0	0	10	23.5	66.5
1173	0	5	Ls3	Ah	10	5	0	20.5	34.5	45
1173	5	15	Ls3	AhAl	10	4	0	20.5	34.5	45
1173	15	40	Ls3	Al	20	3	0	20.5	34.5	45
1173	40	80	Lts	Bt	30	1	0	35	24	41
1173	80	115	Lts	Bv	40	0	0	35	24	41
1173	115	120	Ls3	Cv	90	0	0	20.5	34.5	45
1174	0	3	Ls3	Ah	20	5	0	20.5	34.5	45
1174	3	10	Sl4	AhAl	20	4	0	13.5	26.5	60
1174	10	30	Sl4	Al	40	4	0	13.5	26.5	60
1174	30	50	Sl4	Bt	60	3	0	13.5	26.5	60
1174	50	90	Uls	Bv	60	3	0	12.5	57.5	30
1174	90	105	St2	Cv	90	0	0	10	7.5	82.5
1175	0	5	Ls3	Aho	5	4	0	20.5	34.5	45
1175	5	25	Sl4	Ahu	5	4	0	13.5	26.5	60
1175	25	35	Ls3	AhBv	30	3	0	20.5	34.5	45
1175	35	60	Sl3	Bv	30	1.5	0	10	23.5	66.5
1175	60	130	Su3	BvCv	10	0.5	0	10	23.5	66.5
1175	130	140	S	C	0	0	0	2.5	5	92.5
1176	0	3	Ls3	Oh	0	5	0	20.5	34.5	45
1176	3	15	Slu	Ah	0	4	0	11.5	45	43.5
1176	15	40	Slu	AhBv	1	4	0	11.5	45	43.5
1176	40	90	Sl4	Bv	1	1	0	13.5	26.5	60
1176	90	130	Sl3	Cv	1	0	0	10	23.5	66.5
1177	0	8	Ut4	Ah	0	5	3	20	65	15
1177	8	20	Lu	Al	0	3	3	23.5	60	16.5
1177	20	45	Lu	Bt	0	1	3	23.5	60	16.5
1177	45	100	Ltu	SdBt	0	0	3	37.5	52.5	10
1177	100	110	Lts	Cv	25	0	3	35	24	41
1178	0	5	Ut4	Ah	60	4	0	20	65	15
1178	5	20	Uls	AhBv	60	4	0	12.5	57.5	30
1178	20	60	Uls	Bv	60	4	0	12.5	57.5	30
1178	60	100	Uls	BvCv	80	4	0	12.5	57.5	30
1178	100	110	Uls	Cv	80	4	0	12.5	57.5	30
1179	0	10	Ls2	Ah	0	4	1	20	45	35
1179	10	20	Ls2	AhAl	0	4	1	20	45	35
1179	20	40	Ls3	Al	0	2	1	20.5	34.5	45
1179	40	70	Ls3	Bt	10	1	1	20.5	34.5	45
1179	70	105	Ls2	Bv	10	0	1	20	45	35
1179	105	120	Ls2	Cv	30	0	1	20	45	35
1180	0	5	Ls3	Aho	5	6	0	20.5	34.5	45
1180	5	20	Ls3	Ahu	5	5	0	20.5	34.5	45
1180	20	35	Sl4	AhAl	10	4	0	13.5	26.5	60
1180	35	60	Sl4	Al	10	2	0	13.5	26.5	60
1180	60	90	Ls3	Bt	20	0	0	20.5	34.5	45
1180	90	100	Ls3	Cv	20	0	0	20.5	34.5	45
1181	0	5	Ls2	Ah	5	4	1	20	45	35
1181	5	15	Ls2	AhAl	5	3	1	20	45	35
1181	15	30	Ls2	Al	10	3	1	20	45	35
1181	30	70	Lt2	Bt	1	1	1	30	42.5	27.5
1181	70	80	Ls3	Bv	20	2	1	20.5	34.5	45
1181	80	100	Slu	Cv	20	0	1	11.5	45	43.5
1182	0	5	Lts	Ah	2	5	0	35	24	41
1182	5	20	Lts	Al	5	4	0	35	24	41
1182	20	40	Ls2	Bt	10	3	0	20	45	35
1182	40	70	Ls3	Cv	95	2	0	20.5	34.5	45
1183	0	5	Ls3	nan	10	5	0	20.5	34.5	45
1183	5	25	Slu	nan	10	4	0	11.5	45	43.5
1183	25	65	Sl4	nan	10	3	0	13.5	26.5	60
1183	65	100	Ls3	nan	20	2	0	20.5	34.5	45
1183	100	140	Ls3	nan	20	0	0	20.5	34.5	45
1183	140	160	Ls3	nan	nan	0	0	20.5	34.5	45
1183	160	180	Su4	nan	nan	0	0	4	45	51
1184	0	5	Lu	Aho	0	3	3	23.5	60	16.5
1184	5	15	Lu	Ahu	0	3	3	23.5	60	16.5
1184	15	20	Lu	Bv	0	2.5	3	23.5	60	16.5
1184	20	40	Ltu	Go	0	2	3	37.5	52.5	10
1184	40	60	Lt3	Gor	0	1	3	40	40	20
1184	60	100	Lt2	Gr	5	0	3	30	42.5	27.5
1185	0	20	Ut4	Ah	0	3	4	20	65	15
1185	20	30	Ut4	AlSw	0	2	4	20	65	15
1185	30	40	Lt3	SdBt	2	0.5	4	40	40	20
1185	40	70	Lt2	nan	2	2	4	30	42.5	27.5
1185	70	110	Ut4	nan	5	0	4	20	65	15
1186	0	15	Lts	Ah	20	5	0	35	24	41
1186	15	40	Ls3	Bv	60	3	0	20.5	34.5	45
1186	40	80	Su3	BvAh	40	5	0	10	23.5	66.5
1186	80	100	Su3	AhBv	60	5	0	10	23.5	66.5
1187	0	10	Ls3	AhBv	5	3	0	20.5	34.5	45
1187	10	35	Ls3	nan	5	3	0	20.5	34.5	45
1187	35	50	Sl4	AhBv	30	3	0	13.5	26.5	60
1187	50	100	Sl3	Bv	10	3	0	10	23.5	66.5
1187	100	140	Sl3	BvCv	5	3	0	10	23.5	66.5
1187	140	160	Su4	C	0	nan	0	4	45	51
1188	0	7	Lu	Ah oben	10	4	0	23.5	60	16.5
1188	7	30	Lt2	Ah unten	30	4	0	30	42.5	27.5
1188	30	70	Lt3	Bv	70	3	0	40	40	20
1188	70	90	Lts	Cv	70	2	0	35	24	41
1189	0	20	T	Ah	70	4	0	82.5	8.8	8.8
1189	20	40	Lt3	Bv	80	4	0	40	40	20
1189	40	80	Lt2	BvCv	90	3	0	30	42.5	27.5
1189	80	100	Lt2	Cv	80	2	0	30	42.5	27.5
1190	0	2	Ltu	Of	0	6	0	37.5	52.5	10
1190	2	30	Ul4	Ah	40	4	0	22	72	6
1190	30	45	Uls	Bv	80	3	0	12.5	57.5	30
1190	45	70	Uls	BvCv	80	2	0	12.5	57.5	30
1190	70	100	Uls	Cv	80	1	0	12.5	57.5	30
1191	0	5	Lt2	Ah oben	0	5	0	30	42.5	27.5
1191	5	10	Ls2	Ah unten	10	5	0	20	45	35
1191	10	30	Slu	AhBv	10	3	0	11.5	45	43.5
1191	30	70	Sl3	Bv	20	2	0	10	23.5	66.5
1191	70	105	Slu	BvCv	20	2	0	11.5	45	43.5
1191	105	130	Slu	Cv	30	1	0	11.5	45	43.5
1192	0	10	Ls4	Ah	30	5	0	21	21.5	57.5
1192	10	30	Sl4	AhBv	30	5	0	13.5	26.5	60
1192	30	90	Su3	Bv	40	4	0	10	23.5	66.5
1192	90	110	Su2	BvCv	50	2	0	2.5	17.5	80
1192	110	120	Su2	Cv	50	2	0	2.5	17.5	80
1193	0	3	Ul4	Aho	0	4	4	22	72	6
1193	3	15	Ul4	Ahu	1	4	4	22	72	6
1193	15	40	Ul4	Al	1	3	4	22	72	6
1193	40	100	Ul4	SwAl	1	0	4	22	72	6
1193	100	140	Lts	SdBt	10	0	4	35	24	41
1193	140	150	Tl	Cn	0	0	4	55	30	15
1194	0	3	Lu	Oh	0	4	2	23.5	60	16.5
1194	3	25	Lu	Ah	0	3	2	23.5	60	16.5
1194	25	50	Lu	Al	2	2	2	23.5	60	16.5
1194	50	70	Lu	Bt	2	1	2	23.5	60	16.5
1194	70	95	Lu	BtCv	5	1	2	23.5	60	16.5
1194	95	120	Ltu	BtCv	25	0	2	37.5	52.5	10
1194	160	200	nan	Cv	25	0	2	nan	nan	nan
1195	0	0.5	Ul2	Of	0	5	3	10	76.5	13.5
1195	0.5	6	Ul2	Oh	0	5	3	10	76.5	13.5
1195	6	12	Ul2	Ah1	0	4	3	10	76.5	13.5
1195	12	30	Ls2	Bv	1	1	3	20	45	35
1195	30	70	Lt2	Bt	1	1	3	30	42.5	27.5
1195	70	110	Sl2	Go	1	1	3	6.5	15	78.5
1195	110	140	S	Go	1	1	3	2.5	5	92.5
1195	140	160	S	Cv2	1	1	3	2.5	5	92.5
1195	160	180	nan	Cv2	50	nan	3	nan	nan	nan
1196	0	0.5	Ul3	Oh	0	5	4	14.5	75.5	10
1196	0.5	9	Lt3	Ah	0	3	4	40	40	20
1196	9	20	Lt3	Aeh	0	3	4	40	40	20
1196	20	50	Ltu	Bv	5	1	4	37.5	52.5	10
1196	50	100	Lt3	Go	30	0.5	4	40	40	20
1196	100	160	Ls3	Go	50	0.5	4	20.5	34.5	45
1196	160	180	nan	Cv	75	0.5	4	nan	nan	nan
1197	0	1	Ul3	Oh	0	3	4	14.5	75.5	10
1197	1	5	Ul3	Ah	0	3	4	14.5	75.5	10
1197	5	15	Ul4	AhAl	0	3	4	22	72	6
1197	15	30	Lu	Al	0	3	4	23.5	60	16.5
1197	30	80	Lu	Bt	1	0	4	23.5	60	16.5
1197	80	100	Lt2	Bv	0	0	4	30	42.5	27.5
1197	100	120	Ls3	BvCv	0	0	4	20.5	34.5	45
1197	120	140	Ls2	Cv	10	0	4	20	45	35
1198	0	15	Tl	Ah	80	5	0	55	30	15
1198	15	30	Tl	AhBv	80	5	0	55	30	15
1198	30	70	Tl	Bv	80	2	0	55	30	15
1198	70	120	St2	BvCv	70	2	0	10	7.5	82.5
1198	120	140	Sl3	Cv	70	1	0	10	23.5	66.5
1199	0	5	Lu	Ah oben	0	4	0	23.5	60	16.5
1199	5	10	Lt2	Ah unten	0	3	0	30	42.5	27.5
1199	10	25	Lt3	Bv	5	2	0	40	40	20
1199	25	50	Sl3	BvCv	75	2	0	10	23.5	66.5
1199	50	100	S	Cv	90	1	0	2.5	5	92.5
1200	0	5	Uls	Oh	50	4	0	12.5	57.5	30
1200	5	20	Uls	Ah	90	5	0	12.5	57.5	30
1200	20	80	Ul3	Bv	90	2	0	14.5	75.5	10
1201	0	3	Uls	Ah oben	0	2	0	12.5	57.5	30
1201	3	10	Uls	Ah unten	0	2	0	12.5	57.5	30
1201	10	35	Ltu	Al	1	3	0	37.5	52.5	10
1201	35	65	Ts3	Bt	1	1	0	42.5	9	48.5
1201	65	130	Ls3	Cv	80	0.5	0	20.5	34.5	45
1202	0	5	Slu	Ah	0	4	2	11.5	45	43.5
1202	5	15	Slu	Ahl	5	3	2	11.5	45	43.5
1202	15	25	Sl3	Al	10	3	2	10	23.5	66.5
1202	25	50	Lu	Bv	10	2	2	23.5	60	16.5
1202	50	75	Lts	Bt1	25	1	2	35	24	41
1202	75	140	Lts	Bt2	60	0.5	2	35	24	41
1202	140	160	nan	Cv	nan	nan	2	nan	nan	nan
1203	0	8	Ul3	Ah	2	4	0	14.5	75.5	10
1203	8	30	Ul3	Al	10	3	0	14.5	75.5	10
1203	30	60	Lts	BvBt	40	3	0	35	24	41
1203	60	70	Ts3	Bt	30	3	0	42.5	9	48.5
1203	70	nan	nan	C	100	0	0	nan	nan	nan
1401	0	10	Sl3	Ah	5	4	0	10	23.5	66.5
1401	10	35	Ls3	BvAh	10	4	0	20.5	34.5	45
1401	35	70	Ts3	BvCv	10	1.5	0	42.5	9	48.5
1401	70	100	Tu3	Cv	50	0	0	40	50	10
1402	0	5	Uls	Ah	0	3	0	12.5	57.5	30
1402	5	10	Us	AhAl	0	3	0	4	65	31
1402	10	20	Us	Al	0	3	0	4	65	31
1402	20	45	Us	BvAl	0	3	0	4	65	31
1402	45	95	Us	BvBt	0	0	0	4	65	31
1402	95	110	Uls	BtCv	0	0	0	12.5	57.5	30
1403	0	5	Uls	Ah	0	3	2	12.5	57.5	30
1403	5	15	Uls	AhAl	0	3	2	12.5	57.5	30
1403	15	40	Uls	Al	0	2	2	12.5	57.5	30
1403	40	70	Uls	Bt	0	0	2	12.5	57.5	30
1403	70	105	Ut4	SdBt	0	0	2	20	65	15
1404	0	5	Us	Oh	0	3	0	4	65	31
1404	5	10	Ls2	Ah	10	3	0	20	45	35
1404	10	15	Us	AhBv	20	3	0	4	65	31
1404	15	70	Ls2	Bv	20	1	0	20	45	35
1404	70	120	Ls2	Bv	50	0	0	20	45	35
1405	0	10	Lu	Ah	20	5	0	23.5	60	16.5
1405	10	30	Lu	Al	20	4.5	0	23.5	60	16.5
1405	30	50	Lu	Al	20	4.5	0	23.5	60	16.5
1405	50	70	Ltu	Bt	60	2	0	37.5	52.5	10
1406	0	5	Ul4	Ah	5	3	0	22	72	6
1406	5	20	Ul4	AhAl	5	3	0	22	72	6
1406	20	40	Lt3	Al	5	2	0	40	40	20
1406	40	60	Tl	Bt	5	1	0	55	30	15
1410	0	10	Lu	Aho	70	6	0	23.5	60	16.5
1410	10	20	Lu	Ahu	70	5	0	23.5	60	16.5
1410	20	30	Ltu	BvAh	80	3	0	37.5	52.5	10
1410	30	60	Ltu	BvCv	80	2	0	37.5	52.5	10
1410	60	80	nan	Cv	100	0	0	nan	nan	nan
1411	0	5	Sl2	Ah	20	6	0	6.5	15	78.5
1411	5	10	Sl3	Ahl	20	3	0	10	23.5	66.5
1411	10	40	Lsu	Al	20	1	0	20	45	35
1411	40	110	Lts	Bvt	20	1	0	35	24	41
1412	0	2	Lt2	Ah	5	5	0	30	42.5	27.5
1412	2	10	Ls3	AhBv	5	4	0	20.5	34.5	45
1412	10	60	Slu	Bv	5	3	0	11.5	45	43.5
1412	60	80	Ls3	BvCv	20	1	0	20.5	34.5	45
1413	0	10	Lu	Aho	20	6	0	23.5	60	16.5
1413	10	20	Lu	Ahu	50	4	0	23.5	60	16.5
1413	20	30	Lsu	AhCv	75	4	0	20	45	35
1413	30	60	Lsu	Cv	90	1	0	20	45	35
1414	0	5	nan	Oh	nan	5	nan	nan	nan	nan
1414	5	10	Sl4	Ahe	5	5	0	13.5	26.5	60
1414	10	20	Sl2	Bv	10	3	0	6.5	15	78.5
1414	20	25	Su2	Bhv	20	3	0	2.5	17.5	80
1414	25	75	Su2	Bsv	20	2	0	2.5	17.5	80
1414	75	105	Su2	Cv	70	2	0	2.5	17.5	80
1415	0	4	Lu	Ah	0	5	2	23.5	60	16.5
1415	4	10	Lu	AhAl	0	3	2	23.5	60	16.5
1415	10	65	Ul2	Al	0	2	2	10	76.5	13.5
1461	0	5	Tl	Ah oben	0	3	0	55	30	15
1461	5	15	Tl	Ah unten	5	3	0	55	30	15
1461	15	45	Lt3	Bv	60	2	0	40	40	20
1461	45	100	Us	BvCv	40	1	0	4	65	31
1461	100	110	Uls	Cv	60	1	0	12.5	57.5	30
1462	0	7	Us	Ah	20	3	0	4	65	31
1462	7	20	Us	AhAl	20	3	0	4	65	31
1462	20	30	Us	Al	20	3	0	4	65	31
1462	30	60	St2	Bt	50	3	0	10	7.5	82.5
1462	60	70	Su4	Bv	80	3	0	4	45	51
1462	70	110	Su2	Cv1	90	2	0	2.5	17.5	80
1462	110	140	Su2	Cv2	80	0	0	2.5	17.5	80
1463	0	10	Lt3	Oh	0	4	4	40	40	20
1463	10	25	Lt3	Al	0	2	4	40	40	20
1463	25	60	Tl	SdBt	0	2	4	55	30	15
1463	60	100	Su3	Bv	0	1	4	10	23.5	66.5
1463	100	160	Su2	Cv1	40	1	4	2.5	17.5	80
1463	160	180	S	Cv2	0	0	4	2.5	5	92.5
1464	0	5	Lu	Oh	0	4	4	23.5	60	16.5
1464	5	10	Lu	Aeh	0	1	4	23.5	60	16.5
1464	10	20	Lu	Ahl	0	1	4	23.5	60	16.5
1464	20	40	Lu	Al	0	1	4	23.5	60	16.5
1464	40	70	Lt3	SdBt	0	0.5	4	40	40	20
1464	70	100	Slu	BvCv	40	2	4	11.5	45	43.5
1464	100	140	Su3	Cv	70	1	4	10	23.5	66.5
